# Supplementary material for: Single-cell transcriptomics reveal extracellular vesicles secretion with a cardiomyocyte proteostasis signature during pathological remodeling
Source: Springer Nature journal article supplement (doi:10.1038/s42003-022-04402-9), 2023-01-21
Supplement: MOESM3 [file 42003_2022_4402_MOESM3_ESM.pdf › 42003_2022_4402_MOESM3_ESM.pdf]

## Description of Additional Supplementary Files

**File name:** Supplementary Data 1

**Description:** ProteinPilot™ Software Report.

**File name:** Supplementary Data 2

**Description:** ExoCarta TOP proteins.

**File name:** Supplementary Data 3

**Description:** Antibody list.
