# Supplementary material for: Single-cell transcriptomics reveal extracellular vesicles secretion with a cardiomyocyte proteostasis signature during pathological remodeling
Source: Springer Nature journal article supplement (doi:10.1038/s42003-022-04402-9), 2023-01-21
Supplement: MOESM4 [file 42003_2022_4402_MOESM4_ESM.pdf › 42003_2022_4402_MOESM4_ESM.pdf]

## Supplementary Information

### Single-cell transcriptomics reveal extracellular vesicles secretion with a cardiomyocyte proteostasis signature during pathological remodeling

Eric Schoger<sup>1,2,3\*</sup>, Federico Bleckwedel<sup>1,2\*</sup>, Giulia Germena<sup>4,2</sup>, Cheila Rocha<sup>4</sup>, Petra Tucholla<sup>1,2</sup>, Izzatullo Sobitov<sup>1,2</sup>, Wiebke Möbius<sup>5</sup>, Maren Sitte<sup>6</sup>, Christof Lenz<sup>7</sup>, Mostafa Samak<sup>4,2</sup>, Rabea Hinkel<sup>4,2,8</sup>, Zoltán V. Varga<sup>9,10</sup>, Zoltán Giricz<sup>9,10</sup>, Gabriela Salinas<sup>6</sup>, Julia C. Gross<sup>11</sup> and Laura C. Zelarayán<sup>1,2,3</sup>

\*The authors contributed equally

<sup>1</sup> Institute of Pharmacology and Toxicology, University Medical Center Göttingen (UMG), 37075 Göttingen, Germany

<sup>2</sup> German Center for Cardiovascular Research (DZHK) partner site Göttingen, 37075 Göttingen, Germany

<sup>3</sup> Cluster of Excellence "Multiscale Bioimaging: from Molecular Machines to Networks of Excitable Cells" (MBExC), University of Göttingen, 37075 Göttingen, Germany

<sup>4</sup> Laboratory Animal Science Unit, Leibniz-Institut für Primatenforschung, Deutsches Primatenzentrum GmbH, 37075 Göttingen, Germany

<sup>5</sup> Max-Planck-Institute for Multidisciplinary Sciences, 37075 Göttingen, Germany

<sup>6</sup> NGS Integrative Genomics Core Unit (NIG), University Medical Center Göttingen (UMG), 37075 Göttingen, Germany

<sup>7</sup> Department of Clinical Chemistry, University Medical Center Göttingen (UMG), 37075 Göttingen, Germany

<sup>8</sup> Bioanalytical Mass Spectrometry Group, Max Planck Institute for Multidisciplinary Sciences, 37075 Göttingen, Germany

<sup>9</sup> Institute for Animal Hygiene, Animal Welfare and Farm Animal Behaviour (ITTN), Stiftung Tierärztliche Hochschule Hannover, University of Veterinary Medicine, 30173 Hannover, Germany.

<sup>10</sup> HCEMM-SU Cardiometabolic Immunology Research Group, Department of Pharmacology and Pharmacotherapy, Semmelweis University, H-1085 Budapest, Hungary

<sup>11</sup> Pharmahungary Group, H-1085 Budapest, Hungary

<sup>12</sup> Health and Medical University, D-14471 Potsdam, Germany

Corresponding Author: Laura C. Zelarayán, [laura.zelarayan@med.uni-goettingen.de](mailto:laura.zelarayan@med.uni-goettingen.de)

## Supplementary Data 1

ProteinPilot™ Software Report  
 Template Version 1.00 light report  
 Summary of Identification Yields

| Data Level                                         |                  | FDR Type | FDR | ID Yield |
|----------------------------------------------------|------------------|----------|-----|----------|
| Identification Yield<br>at FDR Threshold           | Protein          | Local    | 1%  | 572      |
|                                                    |                  |          | 5%  | 611      |
|                                                    |                  |          | 10% | 634      |
|                                                    |                  | Global   | 1%  | 656      |
|                                                    |                  |          | 5%  | 737      |
|                                                    |                  |          | 10% | 810      |
|                                                    | Distinct peptide | Local    | 1%  | 5821     |
|                                                    |                  |          | 5%  | 6806     |
|                                                    |                  |          | 10% | 7224     |
|                                                    |                  | Global   | 1%  | 7330     |
|                                                    |                  |          | 5%  | 8559     |
|                                                    |                  |          | 10% | 9437     |
| Corresponding Confidence in ProteinPilot™ Software | Spectral         | Local    | 1%  | 68185    |
|                                                    |                  |          | 5%  | 77518    |
|                                                    |                  |          | 10% | 81784    |
|                                                    |                  | Global   | 1%  | 83818    |
|                                                    |                  |          | 5%  | 96643    |
|                                                    |                  |          | 10% | 98785    |
|                                                    | Protein          | Local    | 1%  | 99.0%    |
|                                                    |                  |          | 5%  | 95.9%    |
|                                                    |                  |          | 10% | 92.4%    |
|                                                    |                  | Global   | 1%  | 84.9%    |
|                                                    |                  |          | 5%  | 46.3%    |
|                                                    |                  |          | 10% | 22.4%    |
|                                                    | Distinct peptide | Local    | 1%  | 99.5%    |
|                                                    |                  |          | 5%  | 97.1%    |
|                                                    |                  |          | 10% | 92.9%    |
|                                                    |                  | Global   | 1%  | 91.1%    |
|                                                    |                  |          | 5%  | 49.9%    |
|                                                    |                  |          | 10% | 31.2%    |
|                                                    | Spectral         | Local    | 1%  | 97.2%    |
|                                                    |                  |          | 5%  | 81.5%    |
|                                                    |                  |          | 10% | 62.0%    |
|                                                    |                  | Global   | 1%  | 49.8%    |
|                                                    |                  |          | 5%  | 8.2%     |
|                                                    |                  |          | 10% | 0.1%     |

Total identified proteins: 573 Quants @ 1% FDR

| Origin | Accession  | ID              | Gene names         | Primary Gene |
|--------|------------|-----------------|--------------------|--------------|
| sp     | A2ASS6     | TITIN_MOUSE     | Ttn                | Ttn          |
| sp     | Q02566     | MYH6_MOUSE      | Myh6 Myhca         | Myh6         |
| sp     | Q60675     | LAMA2_MOUSE     | Lama2              | Lama2        |
| sp     | O55143-2   | AT2A2_MOUSE     | Atp2a2             | Atp2a2       |
| tr     | F6U7V1     | F6U7V1_MOUSE    | Ryr2               | Ryr2         |
| sp     | Q61554     | FBN1_MOUSE      | Fbn1 Fbn-1         | Fbn1         |
| tr     | J3QQ16     | J3QQ16_MOUSE    | Col6a3             | Col6a3       |
| sp     | Q9JI91     | ACTN2_MOUSE     | Actn2              | Actn2        |
| tr     | E9Q3X0     | E9Q3X0_MOUSE    | Mvp                | Mvp          |
| tr     | E9PZ16     | E9PZ16_MOUSE    | Hspg2              | Hspg2        |
| tr     | Q3UHL6     | Q3UHL6_MOUSE    | Fn1                | Fn1          |
| sp     | P58771     | TPM1_MOUSE      | Tpm1 Tpm-1 Tpm2    | Tpm1         |
| sp     | Q8BMF4     | ODP2_MOUSE      | Dlat               | Dlat         |
| sp     | Q61292     | LAMB2_MOUSE     | Lamb2 Lams         | Lamb2        |
| sp     | P68134     | ACTS_MOUSE      | Acta1 Acta         | Acta1        |
| tr     | F8VQJ3     | F8VQJ3_MOUSE    | Lamc1              | Lamc1        |
| sp     | Q8BMS1     | ECHA_MOUSE      | Hadha              | Hadha        |
| sp     | Q04857     | CO6A1_MOUSE     | Col6a1             | Col6a1       |
| sp     | Q01853     | TERA_MOUSE      | Vcp                | Vcp          |
| tr     | D3Z041     | D3Z041_MOUSE    | Acsl1              | Acsl1        |
| tr     | E9QN70     | E9QN70_MOUSE    | Lamb1              | Lamb1        |
| sp     | Q8VDN2     | AT1A1_MOUSE     | Atp1a1             | Atp1a1       |
| tr     | Q5SXR6     | Q5SXR6_MOUSE    | Cltc               | Cltc         |
| sp     | P10493     | NID1_MOUSE      | Nid1 Ent           | Nid1         |
| sp     | Q9D8E6     | RL4_MOUSE       | Rpl4               | Rpl4         |
| sp     | Q61838     | PZP_MOUSE       | Pzp A2m            | Pzp          |
| sp     | Q924X2     | CPT1B_MOUSE     | Cpt1b              | Cpt1b        |
| tr     | E9QPE7     | E9QPE7_MOUSE    | Myh11              | Myh11        |
| sp     | P09528     | FRIH_MOUSE      | Fth1 Fth           | Fth1         |
| sp     | Q99JY0     | ECHB_MOUSE      | Hadhb              | Hadhb        |
| sp     | Q60932     | VDAC1_MOUSE     | Vdac1 Vdac5        | Vdac1        |
| sp     | P62702     | RS4X_MOUSE      | Rps4x Rps4         | Rps4x        |
| sp     | P14148     | RL7_MOUSE       | Rpl7               | Rpl7         |
| sp     | Q7TQ48     | SRCA_MOUSE      | Srl Sar            | Srl          |
| sp     | Q9WUB3     | PYGM_MOUSE      | Pygm               | Pygm         |
| sp     | P62908     | RS3_MOUSE       | Rps3               | Rps3         |
| tr     | Q9CPX4     | Q9CPX4_MOUSE    | Ftl1-ps1 mCG_17    | Ftl1         |
| sp     | Q6P8J7     | KCRS_MOUSE      | Ckmt2              | Ckmt2        |
| sp     | P48962     | ADT1_MOUSE      | Slc25a4 Anc1 Ant1  | Slc25a4      |
| tr     | Z4YJV4     | Z4YJV4_MOUSE    | Ogdh               | Ogdh         |
| sp     | Q8C129     | LCAP_MOUSE      | Lnpep              | Lnpep        |
| sp     | P12970     | RL7A_MOUSE      | Rpl7a Surf-3 Surf3 | Rpl7a        |
| tr     | F8WIT2     | F8WIT2_MOUSE    | Anxa6              | Anxa6        |
| sp     | Q02788     | CO6A2_MOUSE     | Col6a2             | Col6a2       |
| sp     | Q9D2G2     | ODO2_MOUSE      | Dlst               | Dlst         |
| tr     | Q3UIK0     | Q3UIK0_MOUSE    | Mybpc3             | Mybpc3       |
| tr     | A0A0R4J083 | 0A0R4J083_MOUSE | Acadl              | Acadl        |

|    |            |                  |                       |         |
|----|------------|------------------|-----------------------|---------|
| sp | Q8VDD5     | MYH9_MOUSE       | Myh9                  | Myh9    |
| sp | P97351     | RS3A_MOUSE       | Rps3a Rps3a1          | Rps3a   |
| sp | Q8BKZ9     | ODPX_MOUSE       | Pdhx                  | Pdhx    |
| sp | Q03265     | ATPA_MOUSE       | Atp5f1a Atp5a1        | Atp5f1a |
| tr | Q6P3Z7     | Q6P3Z7_MOUSE     | Tnnt2                 | Tnnt2   |
| sp | P26041     | MOES_MOUSE       | Msn                   | Msn     |
| sp | Q921G7     | ETFD_MOUSE       | Etfdh                 | Etfdh   |
| tr | E9Q6A6     | E9Q6A6_MOUSE     | Col6a6                | Col6a6  |
| sp | P09542     | MYL3_MOUSE       | Myl3 Mlc1v Mylc       | Myl3    |
| sp | Q91VD9     | NDUS1_MOUSE      | Ndufs1                | Ndufs1  |
| sp | Q91ZJ5     | UGPA_MOUSE       | Ugp2                  | Ugp2    |
| sp | P47857-3   | PFKAM_MOUSE      | Pfkm Pfk-m Pfkα       | Pfkm    |
| sp | P14206     | RSSA_MOUSE       | Rpsa Lamr1 P40-8      | Rpsa    |
| sp | P47911     | RL6_MOUSE        | Rpl6                  | Rpl6    |
| tr | A0A075B6A0 | A0A075B6A0_MOUSE | Ighm                  | Ighm    |
| sp | P53395     | ODB2_MOUSE       | Dbt                   | Dbt     |
| tr | E9Q1J7     | E9Q1J7_MOUSE     | Pccb                  | Pccb    |
| tr | A0A1D5RLW5 | A0A1D5RLW5_MOUSE | Rpl18a                | Rpl18a  |
| sp | P47962     | RL5_MOUSE        | Rpl5                  | Rpl5    |
| sp | P14869     | RLA0_MOUSE       | Rplp0 Arbp            | Rplp0   |
| sp | P14131     | RS16_MOUSE       | Rps16                 | Rps16   |
| sp | Q1XH17     | TRI72_MOUSE      | Trim72 Mg53           | Trim72  |
| sp | Q8BLF1     | NCEH1_MOUSE      | Nceh1 Aadacl1 Kiaa117 | Nceh1   |
| sp | P25444     | RS2_MOUSE        | Rps2 L1rep3 Rps4      | Rps2    |
| sp | P68040     | RACK1_MOUSE      | Rack1 Gnb2-rs1 Gnb2   | Rack1   |
| sp | Q60930     | VDAC2_MOUSE      | Vdac2 Vdac6           | Vdac2   |
| tr | E9PWZ3     | E9PWZ3_MOUSE     | Rpl3l                 | Rpl3l   |
| sp | P62242     | RS8_MOUSE        | Rps8                  | Rps8    |
| tr | E9PYK3     | E9PYK3_MOUSE     | Parp4                 | Parp4   |
| tr | Q921R2     | Q921R2_MOUSE     | Rps13 mCG_12336       | Rps13   |
| sp | Q8K2B3     | SDHA_MOUSE       | Sdha                  | Sdha    |
| sp | P56480     | ATPB_MOUSE       | Atp5f1b Atp5b         | Atp5f1b |
| tr | A0A0R3P9C8 | A0A0R3P9C8_MOUSE | Ndufa9                | Ndufa9  |
| sp | Q91ZA3     | PCCA_MOUSE       | Pcca                  | Pcca    |
| sp | P62918     | RL8_MOUSE        | Rpl8                  | Rpl8    |
| sp | P61358     | RL27_MOUSE       | Rpl27                 | Rpl27   |
| tr | Q5XJF6     | Q5XJF6_MOUSE     | mCG_123122 mCG        | Rpl10a  |
| sp | Q61001     | LAMA5_MOUSE      | Lama5                 | Lama5   |
| sp | P07310     | KCRM_MOUSE       | Ckm Ckmm              | Ckm     |
| sp | O55234     | PSB5_MOUSE       | Psb5                  | Psb5    |
| sp | P52825     | CPT2_MOUSE       | Cpt2 Cpt-2            | Cpt2    |
| sp | P63017     | HSP7C_MOUSE      | Hspa8 Hsc70 Hsc70     | Hspa8   |
| sp | O09061     | PSB1_MOUSE       | Psb1                  | Psb1    |
| sp | Q6ZWN5     | RS9_MOUSE        | Rps9                  | Rps9    |
| sp | P62245     | RS15A_MOUSE      | Rps15a                | Rps15a  |
| sp | Q9D1G3     | HHATL_MOUSE      | Hhatl Gup1 Kiaa117    | Hhatl   |
| sp | P19253     | RL13A_MOUSE      | Rpl13a P198 Tstap19   | Rpl13a  |
| sp | P54071     | IDHP_MOUSE       | Idh2                  | Idh2    |
| tr | Q3TVK3     | Q3TVK3_MOUSE     | Dnpep                 | Dnpep   |
| sp | P52480-2   | KPYM_MOUSE       | Pkm Pk3 Pkm2 Pykr     | Pkm     |

|    |            |                 |                   |          |
|----|------------|-----------------|-------------------|----------|
| sp | P05064     | ALDOA_MOUSE     | Aldoa Aldo1       | Aldoa    |
| sp | P62754     | RS6_MOUSE       | Rps6              | Rps6     |
| sp | Q6URW6-3   | MYH14_MOUSE     | Myh14             | Myh14    |
| sp | P82350     | SGCA_MOUSE      | Sgca              | Sgca     |
| tr | A0A0G2JES3 | 0A0G2JES3_MOUSE | Rpl9              | Rpl9     |
| sp | Q64514     | TPP2_MOUSE      | Tpp2              | Tpp2     |
| sp | Q9R1P0     | PSA4_MOUSE      | Psma4             | Psma4    |
| sp | P47738     | ALDH2_MOUSE     | Aldh2 Ahd-1 Ahd1  | Aldh2    |
| sp | Q9Z2U0     | PSA7_MOUSE      | Psma7             | Psma7    |
| sp | Q9CZU6     | CISY_MOUSE      | Cs                | Cs       |
| sp | Q9CZ13     | QCR1_MOUSE      | Uqcrc1            | Uqcrc1   |
| sp | Q99K10     | ACON_MOUSE      | Aco2              | Aco2     |
| tr | A0A1Y7VKY1 | 0A1Y7VKY1_MOUSE | Gm11361 mCG_1166  | Gm11361  |
| tr | F6SVV1     | F6SVV1_MOUSE    | Gm9493            | Gm9493   |
| sp | Q9QUM9     | PSA6_MOUSE      | Psma6             | Psma6    |
| sp | P14094     | AT1B1_MOUSE     | Atp1b1 Atp4b      | Atp1b1   |
| sp | Q9R1P4     | PSA1_MOUSE      | Psma1             | Psma1    |
| sp | P35564     | CALX_MOUSE      | Canx              | Canx     |
| tr | A0A1B0GT92 | 0A1B0GT92_MOUSE | Gys1              | Gys1     |
| tr | Q564E2     | Q564E2_MOUSE    | ha Ldh1 mCG_199   | Ldha     |
| tr | J3QMG3     | J3QMG3_MOUSE    | Vdac3             | Vdac3    |
| sp | P62889     | RL30_MOUSE      | Rpl30             | Rpl30    |
| sp | P11499     | HS90B_MOUSE     | ib1 Hsp84 Hsp84-1 | Hsp90ab1 |
| sp | Q99LB2     | DHRS4_MOUSE     | Dhrs4 D14Ucla2    | Dhrs4    |
| sp | P47963     | RL13_MOUSE      | Rpl13             | Rpl13    |
| sp | Q9CZX8     | RS19_MOUSE      | Rps19             | Rps19    |
| sp | Q9R118     | HTRA1_MOUSE     | Htra1 Htra Prss11 | Htra1    |
| sp | Q08857     | CD36_MOUSE      | Cd36              | Cd36     |
| tr | A0A1B0GQU8 | 0A1B0GQU8_MOUSE | Rpl18             | Rpl18    |
| tr | E9QAZ2     | E9QAZ2_MOUSE    |                   |          |
| sp | Q9D0M3     | CY1_MOUSE       | Cyc1              | Cyc1     |
| sp | O54724     | CAVN1_MOUSE     | Cavin1 Ptrf       | Cavin1   |
| sp | Q9DB77     | QCR2_MOUSE      | Uqcrc2            | Uqcrc2   |
| sp | Q9DCT2     | NDUS3_MOUSE     | Ndufs3            | Ndufs3   |
| sp | P27659     | RL3_MOUSE       | Rpl3              | Rpl3     |
| sp | P62983     | RS27A_MOUSE     | rs27a Uba80 Ubce1 | Rps27a   |
| sp | Q9QXX4     | CMC2_MOUSE      | Slc25a13 Aralar2  | Slc25a13 |
| sp | O55126     | NIPS2_MOUSE     | Nipsnap2 Gbas     | Nipsnap2 |
| sp | P23927     | CRYAB_MOUSE     | Cryab Crya2       | Cryab    |
| sp | Q9CPR4     | RL17_MOUSE      | Rpl17             | Rpl17    |
| sp | P62281     | RS11_MOUSE      | Rps11             | Rps11    |
| sp | P19783     | COX41_MOUSE     | Cox4i1 Cox4 Cox4e | Cox4i1   |
| sp | Q9D379     | HYEP_MOUSE      | Ephx1             | Ephx1    |
| sp | P20029     | GRP78_MOUSE     | Hspa5 Grp78       | Hspa5    |
| sp | Q9D517     | PLCC_MOUSE      | Agpat3 Lpaat3     | Agpat3   |
| sp | P26443     | DHE3_MOUSE      | Glud1 Glud        | Glud1    |
| sp | Q8CHS7     | DRS7C_MOUSE     | Dhrs7c Sdr32c2    | Dhrs7c   |
| sp | Q61941     | NNTM_MOUSE      | Nnt               | Nnt      |
| sp | Q9CQQ7     | AT5F1_MOUSE     | Atp5f1            | Atp5f1   |
| sp | Q9EQH3     | VPS35_MOUSE     | Vps35 Mem3        | Vps35    |

|    |            |                  |                      |           |
|----|------------|------------------|----------------------|-----------|
| sp | Q9Z2U1     | PSA5_MOUSE       | Pma5                 | Pma5      |
| sp | P14115     | RL27A_MOUSE      | Rpl27a               | Rpl27a    |
| tr | Q3TWW4     | Q3TWW4_MOUSE     | p2m1 mCG_12845       | Ap2m1     |
| sp | Q9DCJ5     | NDUA8_MOUSE      | Ndufa8               | Ndufa8    |
| sp | P61255     | RL26_MOUSE       | Rpl26                | Rpl26     |
| sp | P63276     | RS17_MOUSE       | Rps17                | Rps17     |
| tr | D3YXT0     | D3YXT0_MOUSE     | Ndufs2               | Ndufs2    |
| sp | P62264     | RS14_MOUSE       | Rps14                | Rps14     |
| tr | A8DUK4     | A8DUK4_MOUSE     | Glna1 Hbb-bt Hbbt    | Hbb-bs    |
| sp | Q62351     | TFR1_MOUSE       | Tfrc Trfr            | Tfrc      |
| sp | P62806     | H4_MOUSE         | 4f; Hist1h4h; Hist1  | Hist1h4a; |
| sp | P12382     | PFKAL_MOUSE      | Pfkl Pfk-l Pfk       | Pfkl      |
| sp | O70435     | PSA3_MOUSE       | Pma3                 | Pma3      |
| sp | Q9D710     | TMX2_MOUSE       | Tmx2 Txndc14         | Tmx2      |
| tr | D3YUM1     | D3YUM1_MOUSE     | Ndufv1               | Ndufv1    |
| sp | Q35129     | PHB2_MOUSE       | hb2 Bap Bcap37 Re    | Phb2      |
| tr | Q91V55     | Q91V55_MOUSE     | Rps5 mCG_22552       | Rps5      |
| sp | P62631     | EF1A2_MOUSE      | Eef1a2 Eef1a1 Stn    | Eef1a2    |
| sp | P47754     | CAZA2_MOUSE      | Capza2 Cappa2        | Capza2    |
| sp | P49722     | PSA2_MOUSE       | Pma2 Lmpc3           | Pma2      |
| tr | Q6ZWZ6     | Q6ZWZ6_MOUSE     | ps12 mCG_132913      | Rps12-ps3 |
| sp | P48036     | ANXA5_MOUSE      | Anxa5 Anx5           | Anxa5     |
| sp | P24270     | CATA_MOUSE       | Cat Cas-1 Cas1       | Cat       |
| sp | Q9R1P3     | PSB2_MOUSE       | Psb2                 | Psb2      |
| sp | P63260     | ACTG_MOUSE       | Actg1 Actg           | Actg1     |
| sp | P67984     | RL22_MOUSE       | Rpl22                | Rpl22     |
| sp | Q60994     | ADIPO_MOUSE      | adipoq Acdc Acrp30 A | Adipoq    |
| tr | J3QP71     | J3QP71_MOUSE     | Bsg                  | Bsg       |
| sp | Q8BP67     | RL24_MOUSE       | Rpl24                | Rpl24     |
| tr | A0A1L1SQA8 | A0A1L1SQA8_MOUSE | Rps25                | Rps25     |
| sp | Q60692     | PSB6_MOUSE       | Psb6 Lmp19           | Psb6      |
| sp | P16125     | LDHB_MOUSE       | Ldhb Ldh-2 Ldh2      | Ldhb      |
| tr | Q9CQB4     | Q9CQB4_MOUSE     | Uqcrb mCG_67985      | Uqcrb     |
| tr | A0A140T8M7 | A0A140T8M7_MOUSE |                      |           |
| sp | Q8CGP2     | H2B1P_MOUSE      | Hist1h2bp            | Hist1h2bp |
| sp | Q8R1S0     | COQ6_MOUSE       | Coq6                 | Coq6      |
| sp | Q9DBH5     | LMAN2_MOUSE      | Lman2                | Lman2     |
| tr | F2Z456     | F2Z456_MOUSE     | Cyb5r3               | Cyb5r3    |
| sp | P62900     | RL31_MOUSE       | Rpl31                | Rpl31     |
| sp | P09055     | ITB1_MOUSE       | Itgb1                | Itgb1     |
| sp | P05202     | AATM_MOUSE       | Got2 Got-2           | Got2      |
| tr | B0V2N8     | B0V2N8_MOUSE     | Anxa2                | Anxa2     |
| sp | Q8BWF0     | SSDH_MOUSE       | Aldh5a1              | Aldh5a1   |
| tr | H3BL49     | H3BL49_MOUSE     | Cct8                 | Cct8      |
| sp | Q9CR62     | M2OM_MOUSE       | Slc25a11             | Slc25a11  |
| sp | Q8CI94     | PYGB_MOUSE       | Pygb                 | Pygb      |
| sp | Q9D1D4     | TMEDA_MOUSE      | Tmed10 Tmp21         | Tmed10    |
| tr | Q9CQM8     | Q9CQM8_MOUSE     | EnCG_121646 mCG      | Rpl21     |
| sp | Q91YQ5     | RPN1_MOUSE       | Rpn1                 | Rpn1      |
| sp | Q6PIE5     | AT1A2_MOUSE      | Atp1a2               | Atp1a2    |

|    |            |                  |                     |         |
|----|------------|------------------|---------------------|---------|
| tr | G5E902     | G5E902_MOUSE     | Ic25a3 mCG_1034     | Slc25a3 |
| sp | P70195     | PSB7_MOUSE       | Psmb7 Mmc14         | Psmb7   |
| tr | Q91VB8     | Q91VB8_MOUSE     | obin alpha 1 haem   | Hba-a1  |
| sp | O70572     | NSMA_MOUSE       | Smpd2               | Smpd2   |
| sp | Q8BW75     | AOFB_MOUSE       | Maob                | Maob    |
| tr | E9PZF0     | E9PZF0_MOUSE     | Gm20390             | Gm20390 |
| sp | P62911     | RL32_MOUSE       | Rpl32               | Rpl32   |
| sp | P35979     | RL12_MOUSE       | Rpl12               | Rpl12   |
| sp | Q9R1P1     | PSB3_MOUSE       | Psmb3               | Psmb3   |
| sp | Q60737     | CSK21_MOUSE      | Csnk2a1 Ckii        | Csnk2a1 |
| tr | Q6ZWZ4     | Q6ZWZ4_MOUSE     | Rpl36 mCG_20352     | Rpl36   |
| sp | Q99MQ4     | ASPN_MOUSE       | Aspn                | Aspn    |
| sp | P11404     | FABPH_MOUSE      | Fabp3 Fabph1        | Fabp3   |
| tr | A0A0A0MQG2 | A0A0MQG2_MOUSE   | Sptbn1              | Sptbn1  |
| tr | I7HLV2     | I7HLV2_MOUSE     | 10 RP23-436K3.4-(   | Rpl10   |
| tr | G3X9L6     | G3X9L6_MOUSE     |                     |         |
| tr | S4R1W1     | S4R1W1_MOUSE     | Gm3839              | Gm3839  |
| sp | Q80XN0     | BDH_MOUSE        | Bdh1 Bdh            | Bdh1    |
| sp | P99026     | PSB4_MOUSE       | Psmb4 Lmp3          | Psmb4   |
| sp | Q9D0G0     | RT30_MOUSE       | Mrps30              | Mrps30  |
| sp | Q6ZVV7     | RL35_MOUSE       | Rpl35               | Rpl35   |
| sp | P80318     | TCPG_MOUSE       | Cct3 Cctg           | Cct3    |
| sp | Q60817     | NACA_MOUSE       | Naca                | Naca    |
| tr | A0A286YEB7 | A0A286YEB7_MOUSE | Rps24               | Rps24   |
| sp | Q9CR57     | RL14_MOUSE       | Rpl14               | Rpl14   |
| sp | P07724     | ALBU_MOUSE       | Alb Alb-1 Alb1      | Alb     |
| tr | A0A0N4SV00 | A0A0N4SV00_MOUSE | Cct7                | Cct7    |
| tr | A0A1W2P7Q9 | A0A1W2P7Q9_MOUSE | Myl6                | Myl6    |
| sp | Q63918     | CAVN2_MOUSE      | Cavin2 Sdpr Sdr     | Cavin2  |
| tr | A0A0J9YUZ4 | A0A0J9YUZ4_MOUSE | Hmgb1               | Hmgb1   |
| sp | Q91Z83     | MYH7_MOUSE       | Myh7                | Myh7    |
| sp | P14142     | GTR4_MOUSE       | Slc2a4 Glut-4 Glut4 | Slc2a4  |
| sp | Q3UN02     | LCLT1_MOUSE      | At1 Alcat1 Gm91 Ly  | Lclat1  |
| sp | P62855     | RS26_MOUSE       | Rps26               | Rps26   |
| tr | A0A0G2JDL9 | A0A0G2JDL9_MOUSE | Rap1a mCG_10748     | Rap1a   |
| sp | O54734     | OST48_MOUSE      | Ddost               | Ddost   |
| tr | Q3TLP8     | Q3TLP8_MOUSE     | Rac1 mCG_23557      | Rac1    |
| sp | O55026     | ENTP2_MOUSE      | Entpd2 Cd39I1       | Entpd2  |
| tr | B1AR69     | B1AR69_MOUSE     | Myh13               | Myh13   |
| sp | Q9CPY7     | AMPL_MOUSE       | Lap3 Lapep          | Lap3    |
| sp | Q91YN9     | BAG2_MOUSE       | Bag2                | Bag2    |
| sp | P97429     | ANXA4_MOUSE      | Anxa4 Anx4          | Anxa4   |
| sp | P08752     | GNAI2_MOUSE      | Gnai2 Gnai-2        | Gnai2   |
| sp | P51637     | CAV3_MOUSE       | Cav3                | Cav3    |
| sp | P56391     | CX6B1_MOUSE      | Cox6b1 Cox6b        | Cox6b1  |
| sp | P67778     | PHB_MOUSE        | Phb                 | Phb     |
| tr | Q3UW83     | Q3UW83_MOUSE     | Rps10               | Rps10   |
| sp | Q7TSH2     | KPBB_MOUSE       | Phkb                | Phkb    |
| tr | Q9D881     | Q9D881_MOUSE     | Cox5b mCG_17741     | Gm11273 |
| sp | P62830     | RL23_MOUSE       | Rpl23               | Rpl23   |

|    |            |                  |                    |           |
|----|------------|------------------|--------------------|-----------|
| sp | P61164     | ACTZ_MOUSE       | Actr1a Ctrn1       | Actr1a    |
| sp | P47757     | CAPZB_MOUSE      | Capzb Cappb1       | Capzb     |
| sp | Q9DB20     | ATPO_MOUSE       | Atp5o D12Wsu28e    | Atp5o     |
| tr | E9Q7G1     | E9Q7G1_MOUSE     | Tmed7              | Tmed7     |
| sp | Q9R069     | BCAM_MOUSE       | Bcam Gplu Lu       | Bcam      |
| tr | G3X8R0     | G3X8R0_MOUSE     | Reep5 mCG_12149    | Reep5     |
| sp | P52503     | NDUS6_MOUSE      | Ndufs6 Ip13        | Ndufs6    |
| sp | P04247     | MYG_MOUSE        | Mb                 | Mb        |
| sp | P51881     | ADT2_MOUSE       | Slc25a5 Ant2       | Slc25a5   |
| sp | Q8R127     | SCPD_L_MOUSE     | Sccpdh             | Sccpdh    |
| sp | Q8C7X2     | EMC1_MOUSE       | Emc1 Kiaa0090      | Emc1      |
| sp | Q9D1N9     | RM21_MOUSE       | Mrpl21 D9Wsu149    | Mrpl21    |
| sp | Q35459     | ECH1_MOUSE       | Ech1               | Ech1      |
| sp | P28063     | PSB8_MOUSE       | Psmb8 Lmp7 Mc13    | Psmb8     |
| sp | Q3TMP8     | TM38A_MOUSE      | Tmem38a            | Tmem38a   |
| sp | P41105     | RL28_MOUSE       | Rpl28              | Rpl28     |
| sp | P14685     | PSMD3_MOUSE      | psmd3 P91a Tstap9  | Psmd3     |
| sp | E9Q557     | DESP_MOUSE       | Dsp                | Dsp       |
| sp | Q8BH64     | EHD2_MOUSE       | Ehd2               | Ehd2      |
| sp | Q9ERS2     | NDUAD_MOUSE      | Ndufa13 Grim19     | Ndufa13   |
| tr | S4R1E5     | S4R1E5_MOUSE     | Gpx4               | Gpx4      |
| tr | E9Q8P0     | E9Q8P0_MOUSE     | Tnnc1              | Tnnc1     |
| sp | P48787     | TNNI3_MOUSE      | Tnni3              | Tnni3     |
| sp | Q9CQB5     | CISD2_MOUSE      | 2 Cdgh2 Noxp70     | Cisd2     |
| sp | Q922B1     | MACD1_MOUSE      | Macrocl1 Lrp16     | Macrocl1  |
| sp | P82347     | SGCD_MOUSE       | Sgcd               | Sgcd      |
| sp | P63268     | ACTH_MOUSE       | Actg2 Acta3 Actsg  | Actg2     |
| sp | O88322     | NID2_MOUSE       | Nid2               | Nid2      |
| tr | F6QYE1     | F6QYE1_MOUSE     | Casq2              | Casq2     |
| sp | Q9CPU4     | MGST3_MOUSE      | Mgst3              | Mgst3     |
| sp | P31428     | DPEP1_MOUSE      | Dpep1 Mbd1 Rdp     | Dpep1     |
| sp | Q9DCS9     | NDUBA_MOUSE      | Ndufb10            | Ndufb10   |
| tr | Q3TZS3     | Q3TZS3_MOUSE     | Itga7              | Itga7     |
| tr | Q9D050     | Q9D050_MOUSE     | Mtch2              | Mtch2     |
| sp | P97384     | ANX11_MOUSE      | Anxa11 Anx11       | Anxa11    |
| sp | Q9CQA3     | SDHB_MOUSE       | Sdhb               | Sdhb      |
| sp | Q8BMS4     | COQ3_MOUSE       | Coq3               | Coq3      |
| tr | Q5SVW9     | Q5SVW9_MOUSE     | Tmed4              | Tmed4     |
| sp | Q9ES97     | RTN3_MOUSE       | Rtn3               | Rtn3      |
| sp | P62897     | CYC_MOUSE        | Cycc               | Cycc      |
| sp | P12787     | COX5A_MOUSE      | Cox5a              | Cox5a     |
| sp | O70622     | RTN2_MOUSE       | Rtn2 Nspl1         | Rtn2      |
| tr | D3YTQ9     | D3YTQ9_MOUSE     | Rps15              | Rps15     |
| tr | A0A0N4SW94 | A0A0N4SW94_MOUSE | Myadm              | Myadm     |
| tr | A0A0G2JG29 | A0A0G2JG29_MOUSE | Rps27              | Rps27     |
| sp | Q9CQZ5     | NDUA6_MOUSE      | Ndufa6             | Ndufa6    |
| sp | Q99JB8     | PACN3_MOUSE      | Pacsin3            | Pacsin3   |
| sp | Q64522     | H2A2B_MOUSE      | Hist2h2ab          | Hist2h2ab |
| sp | P06745     | G6PI_MOUSE       | Gpi Gpi1           | Gpi       |
| sp | P00405     | COX2_MOUSE       | co2 COII COX2 mt-1 | Mtco2     |



|    |            |                  |                     |          |
|----|------------|------------------|---------------------|----------|
| sp | A2AMM0     | CAVN4_MOUSE      | Cavin4 Murc         | Cavin4   |
| sp | Q9D1P0     | RM13_MOUSE       | Mrpl13              | Mrpl13   |
| sp | P70704     | AT8A1_MOUSE      | Atp8a1 Atpc1        | Atp8a1   |
| sp | Q9CR61     | NDUB7_MOUSE      | Ndufb7              | Ndufb7   |
| tr | E9Q1X8     | E9Q1X8_MOUSE     | Cacna2d1            | Cacna2d1 |
| tr | G5E839     | G5E839_MOUSE     | Cct4                | Cct4     |
| sp | Q9QYG0     | NDRG2_MOUSE      | drg2 Kiaa1248 Ndr   | Ndrg2    |
| tr | H3BJQ7     | H3BJQ7_MOUSE     | Prdx5               | Prdx5    |
| sp | P43277     | H13_MOUSE        | Hist1h1d H1f3       | Hist1h1d |
| sp | Q99LC3     | NDUAA_MOUSE      | Ndufa10             | Ndufa10  |
| sp | Q64152     | BTF3_MOUSE       | Btf3                | Btf3     |
| sp | P59266     | FITM2_MOUSE      | Fitm2 Fit2          | Fitm2    |
| sp | P31001     | DESM_MOUSE       | Des                 | Des      |
| sp | P08249     | MDHM_MOUSE       | Mdh2 Mor1           | Mdh2     |
| tr | E0CZ27     | E0CZ27_MOUSE     | H3f3a               | H3f3a    |
| sp | P54116     | STOM_MOUSE       | Stom Epb7.2 Epb7    | Stom     |
| tr | G3UXL2     | G3UXL2_MOUSE     | Prps1l3             | Prps1l3  |
| sp | P17751     | TPIS_MOUSE       | Tpi1 Tpi            | Tpi1     |
| sp | Q9WV91     | FPRP_MOUSE       | Ptgfrn Fprp         | Ptgfrn   |
| sp | Q60714     | S27A1_MOUSE      | Slc27a1 Fatp Fatp1  | Slc27a1  |
| sp | Q9CPP6     | NDUA5_MOUSE      | Ndufa5              | Ndufa5   |
| sp | Q8K3J1     | NDUS8_MOUSE      | Ndufs8              | Ndufs8   |
| sp | Q9EP89     | LACTB_MOUSE      | Lactb Lact1         | Lactb    |
| sp | P80317     | TCPZ_MOUSE       | ct6a Cct6 Cctz Cctz | Cct6a    |
| sp | P09470     | ACE_MOUSE        | Ace Dcp1            | Ace      |
| sp | Q06185     | ATP5I_MOUSE      | o5i Atp5k Lfm-1 Lfr | Atp5i    |
| sp | P03911     | NU4M_MOUSE       | Vltnd4 mt-Nd4 Nd4   | Mtnd4    |
| tr | Q8R2K3     | Q8R2K3_MOUSE     | Ssbp1 mCG_15097     | Ssbp1    |
| tr | Q14BI5     | Q14BI5_MOUSE     | Myom2               | Myom2    |
| sp | P24549     | AL1A1_MOUSE      | l1a1 Ahd-2 Ahd2 A   | Aldh1a1  |
| tr | B1AR28     | B1AR28_MOUSE     | Acadvl              | Acadvl   |
| sp | P53986     | MOT1_MOUSE       | Slc16a1 Mct1        | Slc16a1  |
| sp | P60867     | RS20_MOUSE       | Rps20               | Rps20    |
| tr | B1AXW6     | B1AXW6_MOUSE     | Prdx1               | Prdx1    |
| sp | Q8BGH2     | SAM50_MOUSE      | Samm50              | Samm50   |
| sp | Q9JHU4     | DYHC1_MOUSE      | I Dhc1 Dnch1 Dnch   | Dync1h1  |
| sp | P97927     | LAMA4_MOUSE      | Lama4               | Lama4    |
| sp | O70433     | FHL2_MOUSE       | Fhl2                | Fhl2     |
| sp | P42125     | ECI1_MOUSE       | Eci1 Dci            | Eci1     |
| sp | Q3TXS7     | PSMD1_MOUSE      | Psm1                | Psm1     |
| sp | Q8VCT4     | CES1D_MOUSE      | Ces1d Ces1 Ces3     | Ces1d    |
| tr | G3UWC2     | G3UWC2_MOUSE     | Naalad2 mCG_477     | Naalad2  |
| sp | P14152     | MDHC_MOUSE       | Mdh1 Mor2           | Mdh1     |
| sp | Q9CQH7     | BT3L4_MOUSE      | Btf3l4              | Btf3l4   |
| sp | P82349     | SGCB_MOUSE       | Sgcb                | Sgcb     |
| sp | Q9D7N9     | APMAP_MOUSE      | Apm1                | Apm1     |
| tr | A0A0A6YWK5 | A0A0A6YWK5_MOUSE | Ighv1-31            | Ighv1-31 |
| tr | Q3UN88     | Q3UN88_MOUSE     | Mcpt4 mCG_13083     | Mcpt4    |
| sp | Q9CPQ8     | ATP5L_MOUSE      | Atp5l               | Atp5l    |
| sp | Q8BFZ9     | ERLN2_MOUSE      | Erlin2 Spfh2        | Erlin2   |

|    |            |                  |                  |           |
|----|------------|------------------|------------------|-----------|
| sp | Q91WS0     | CISD1_MOUSE      | d1 D10Ert214e Zc | Cisd1     |
| sp | Q6IFX2     | K1C42_MOUSE      | Krt42 Ka22       | Krt42     |
| sp | Q35955     | PSB10_MOUSE      | psmb10 Lmp10 Mec | Psmb10    |
| sp | Q88441     | MTX2_MOUSE       | Mtx2 MNCb-0780   | Mtx2      |
| tr | F8WIE1     | F8WIE1_MOUSE     | Man2c1           | Man2c1    |
| sp | P59999     | ARPC4_MOUSE      | Arpc4 Arc20      | Arpc4     |
| sp | P63101     | 1433Z_MOUSE      | Ywhaz            | Ywhaz     |
| sp | Q9CQR2     | RS21_MOUSE       | Rps21            | Rps21     |
| sp | Q02257     | PLAK_MOUSE       | Jup              | Jup       |
| tr | F6Y6V5     | F6Y6V5_MOUSE     | Ndufb5           | Ndufb5    |
| sp | Q9JJ18     | RL38_MOUSE       | Rpl38            | Rpl38     |
| sp | Q91YP0     | L2HDH_MOUSE      | L2hgdh           | L2hgdh    |
| sp | Q8BWT1     | THIM_MOUSE       | Acaa2            | Acaa2     |
| sp | Q8QZT1     | THIL_MOUSE       | Acat1            | Acat1     |
| sp | Q9CPR5     | RM15_MOUSE       | Mrpl15           | Mrpl15    |
| sp | P58021     | TM9S2_MOUSE      | Tm9sf2           | Tm9sf2    |
| sp | Q07113     | MPRI_MOUSE       | Igf2r            | Igf2r     |
| sp | Q8VDM4     | PSMD2_MOUSE      | Psmd2            | Psmd2     |
| sp | Q9D0F3     | LMAN1_MOUSE      | Lman1 Ergic53    | Lman1     |
| tr | F6VY18     | F6VY18_MOUSE     | Gmpr             | Gmpr      |
| tr | Q3UI33     | Q3UI33_MOUSE     | Metap2 METAP2    | Metap2    |
| tr | A0A0B4J1H6 | A0A0B4J1H6_MOUSE | Igkv2-137        | Igkv2-137 |
| sp | Q8BT60     | CPNE3_MOUSE      | Cpne3 Kiaa0636   | Cpne3     |
| sp | P27467     | WNT3A_MOUSE      | Wnt3a Wnt-3a     | Wnt3a     |
| sp | Q00519     | XDH_MOUSE        | Xdh              | Xdh       |
| sp | P00397     | COX1_MOUSE       | Mtco1 COI mt-Co1 | Mtco1     |
| tr | H3BJ97     | H3BJ97_MOUSE     | Tinagl1          | Tinagl1   |
| sp | Q9DC70     | NDUS7_MOUSE      | Ndufs7           | Ndufs7    |
| sp | Q9D8P4     | RM17_MOUSE       | Mrpl17           | Mrpl17    |
| sp | Q9CQC7     | NDUB4_MOUSE      | Ndufb4           | Ndufb4    |
| sp | Q91W97     | HKDC1_MOUSE      | Hkdc1            | Hkdc1     |
| sp | P03888     | NU1M_MOUSE       | vtnd1 mt-Nd1 Nd  | Mtnd1     |
| tr | Q6ZWQ9     | Q6ZWQ9_MOUSE     | 2900073G15Rik m  | Myl12a    |
| tr | Q6P3F7     | Q6P3F7_MOUSE     | Popdc2           | Popdc2    |
| tr | Q642K5     | Q642K5_MOUSE     | Gm9843 mCG_11    | Fau       |
| tr | F6S4G2     | F6S4G2_MOUSE     | Cds2             | Cds2      |
| tr | A2A547     | A2A547_MOUSE     | Rpl19            | Rpl19     |
| tr | A0A140LHC6 | A0A140LHC6_MOUSE | Csrp3            | Csrp3     |
| tr | A0A0N4SVQ1 | A0A0N4SVQ1_MOUSE | Ndufa4           | Ndufa4    |
| sp | Q9D6J5     | NDUB8_MOUSE      | Ndufb8           | Ndufb8    |
| sp | Q9D023     | MPC2_MOUSE       | Mpc2 Brp44       | Mpc2      |
| sp | Q9CZB0     | C560_MOUSE       | Sdhc             | Sdhc      |
| sp | P62267     | RS23_MOUSE       | Rps23            | Rps23     |
| sp | P61514     | RL37A_MOUSE      | Rpl37a           | Rpl37a    |
| sp | P35486     | ODPA_MOUSE       | Pdha1 Pdha-1     | Pdha1     |
| sp | Q55100     | SNG1_MOUSE       | Syng1            | Syng1     |
| sp | Q8BH59     | CMC1_MOUSE       | Slc25a12 Aralar1 | Slc25a12  |
| tr | A0A1B0GSI7 | A0A1B0GSI7_MOUSE | Col4a1           | Col4a1    |
| tr | G3UYV7     | G3UYV7_MOUSE     | Rps28            | Rps28     |
| tr | A0A0R4J275 | A0A0R4J275_MOUSE | ndufa12 mCG_112C | Ndufa12   |

|    |            |                  |                    |          |
|----|------------|------------------|--------------------|----------|
| tr | F8WIJ0     | F8WIJ0_MOUSE     | Slc12a4            | Slc12a4  |
| tr | A0A0U1RP13 | A0A0U1RP13_MOUSE | Cdipt              | Cdipt    |
| tr | A0A0R4J1Z3 | A0A0R4J1Z3_MOUSE | Tmem33             | Tmem33   |
| sp | Q9D898     | ARP5L_MOUSE      | Arpc5l             | Arpc5l   |
| tr | E9Q800     | E9Q800_MOUSE     | Immt               | Immt     |
| sp | Q9CQN7     | RM41_MOUSE       | Mrpl41             | Mrpl41   |
| sp | Q91V79     | FITM1_MOUSE      | Fitm1 Fit1         | Fitm1    |
| sp | Q8C165     | P20D1_MOUSE      | Pm20d1             | Pm20d1   |
| sp | P49817     | CAV1_MOUSE       | Cav1 Cav           | Cav1     |
| sp | Q9DCU6     | RM04_MOUSE       | Mrpl4 MNCb-3848    | Mrpl4    |
| sp | Q91VJ2     | CAVN3_MOUSE      | Cavin3 Prkcdbp Srb | Cavin3   |
| sp | P68372     | TBB4B_MOUSE      | Tubb4b Tubb2c      | Tubb4b   |
| sp | Q8BH95     | ECHM_MOUSE       | Echs1              | Echs1    |
| sp | Q8BH61     | F13A_MOUSE       | F13a1 F13a         | F13a1    |
| tr | Q8C2Q8     | Q8C2Q8_MOUSE     | Atp5c1             | Atp5c1   |
| sp | P42669     | PURA_MOUSE       | Pura               | Pura     |
| sp | P51863     | VA0D1_MOUSE      | Atp6v0d1 Atp6d     | Atp6v0d1 |
| sp | P80314     | TCPB_MOUSE       | Cct2 Cctb          | Cct2     |
| tr | Z4YJF5     | Z4YJF5_MOUSE     | Myom1              | Myom1    |
| tr | E9Q9M1     | E9Q9M1_MOUSE     | Nt5c2              | Nt5c2    |
| tr | G5E8T0     | G5E8T0_MOUSE     | Dnajc5 mCG_2306    | Dnajc5   |
| sp | Q9DBS1     | TMM43_MOUSE      | Tmem43             | Tmem43   |
| tr | E9Q7L0     | E9Q7L0_MOUSE     | Ogdhl              | Ogdhl    |
| sp | P38647     | GRP75_MOUSE      | Grp75 Hsp74 Hs     | Hspa9    |
| tr | E9QKR0     | E9QKR0_MOUSE     | Gnb2               | Gnb2     |
| sp | P03930     | ATP8_MOUSE       | Atatp8 Atp8 mt-At  | Mtatp8   |
| tr | A2AI91     | A2AI91_MOUSE     | Phka1              | Phka1    |
| sp | Q9ES83     | POPD1_MOUSE      | Bves Pop1 Popdc1   | Bves     |
| sp | Q921S7     | RM37_MOUSE       | Mrpl37             | Mrpl37   |
| sp | P82348     | SGCG_MOUSE       | Sgcg               | Sgcg     |
| sp | P09411     | PGK1_MOUSE       | Pgk1 Pgk-1         | Pgk1     |
| sp | Q9CQ69     | QCR8_MOUSE       | Uqcrq              | Uqcrq    |
| tr | F8WHP8     | F8WHP8_MOUSE     | Atp5j2             | Atp5j2   |
| sp | Q99M87     | DNJA3_MOUSE      | Dnaja3 Tid1        | Dnaja3   |
| sp | O35295     | PURB_MOUSE       | Purb               | Purb     |
| sp | Q9WVL3     | S12A7_MOUSE      | Slc12a7 Kcc4       | Slc12a7  |
| sp | P83882     | RL36A_MOUSE      | Rpl36a Rpl44       | Rpl36a   |
| sp | Q9CQL5     | RM18_MOUSE       | Mrpl18             | Mrpl18   |
| sp | P06342     | HB2Q_MOUSE       | H2-Ab1             | H2-Ab1   |
| sp | Q61171     | PRDX2_MOUSE      | Prdx2 Tdpx1 Tpx    | Prdx2    |
| sp | Q9CQX2     | CYB5B_MOUSE      | Cyb5b Cyb5m        | Cyb5b    |
| sp | Q9JHZ2     | ANKH_MOUSE       | Ankh Ank           | Ankh     |
| tr | Z4YJR1     | Z4YJR1_MOUSE     | Lmf1               | Lmf1     |
| tr | D3YX76     | D3YX76_MOUSE     | Gstm2              | Gstm2    |
| sp | P17427     | AP2A2_MOUSE      | Ap2a2 Adtab        | Ap2a2    |
| sp | P05132     | KAPCA_MOUSE      | Prkaca Pkaca       | Prkaca   |
| tr | A0A0A6YXW6 | A0A0A6YXW6_MOUSE | Igha               | Igha     |
| sp | P60202     | MYPR_MOUSE       | Plp1 Plp           | Plp1     |
| sp | P05201     | AATC_MOUSE       | Got1               | Got1     |
| sp | O70423     | AOC3_MOUSE       | Aoc3 Vap1          | Aoc3     |

|    |            |                 |                    |          |
|----|------------|-----------------|--------------------|----------|
| sp | P70404     | IDHG1_MOUSE     | Idh3g              | Idh3g    |
| sp | Q8VHX6     | FLNC_MOUSE      | Flnc Abpl Fln2     | Flnc     |
| tr | F6V084     | F6V084_MOUSE    | Tmx1               | Tmx1     |
| tr | A0A0R4J0L6 | 0A0R4J0L6_MOUSE | Mrps35             | Mrps35   |
| tr | K3W4T3     | K3W4T3_MOUSE    | Atp6v0a1           | Atp6v0a1 |
| sp | P97499     | TEP1_MOUSE      | Tep1 Tp1           | Tep1     |
| sp | Q8BU88     | RM22_MOUSE      | Mrpl22             | Mrpl22   |
| tr | E9QL80     | E9QL80_MOUSE    | Lpgat1             | Lpgat1   |
| sp | Q9ERI6     | RDH14_MOUSE     | Rdh14              | Rdh14    |
| sp | Q99JI4     | PSMD6_MOUSE     | Psm6               | Psm6     |
| tr | F6QKK2     | F6QKK2_MOUSE    | Arl8a              | Arl8a    |
| tr | Q6PHC1     | Q6PHC1_MOUSE    | Eno1               | Eno1     |
| tr | F8WIS9     | F8WIS9_MOUSE    | Camk2a             | Camk2a   |
| sp | P11983     | TCPA_MOUSE      | Tcp1 Cct1 Ccta     | Tcp1     |
| sp | Q9CVB6     | ARPC2_MOUSE     | Arpc2              | Arpc2    |
| sp | P97742     | CPT1A_MOUSE     | Cpt1a Cpt-1 Cpt1   | Cpt1a    |
| tr | H3BKR2     | H3BKR2_MOUSE    | Gnb1               | Gnb1     |
| sp | Q4ZJN1     | C1QT9_MOUSE     | C1qtnf9            | C1qtnf9  |
| tr | E9Q3T0     | E9Q3T0_MOUSE    | Gm10073            | Gm10073  |
| tr | Q7TSG6     | Q7TSG6_MOUSE    | Rdx                | Rdx      |
| tr | D6RH49     | D6RH49_MOUSE    | Rps27l             | Rps27l   |
| sp | Q35593     | PSDE_MOUSE      | Psm14 Pad1         | Psm14    |
| sp | Q8BY89     | CTL2_MOUSE      | Slc44a2 Ctl2       | Slc44a2  |
| tr | A0A0A6YVS2 | A0A6YVS2_MOUSE  | Tmco1              | Tmco1    |
| sp | Q9CRD2     | EMC2_MOUSE      | mc2 Kiaa0103 Ttc3  | Emc2     |
| tr | A2AP78     | A2AP78_MOUSE    | Hmgb3              | Hmgb3    |
| tr | G3UZT2     | G3UZT2_MOUSE    | Selenbp2           | Selenbp2 |
| sp | P24369     | PPIB_MOUSE      | Ppib               | Ppib     |
| tr | B1AT36     | B1AT36_MOUSE    | Psm12              | Psm12    |
| sp | Q9EQ06     | DHB11_MOUSE     | d17b11 Dhhs8 Pan   | Hsd17b11 |
| tr | Q8BHF5     | Q8BHF5_MOUSE    | Rtn4               | Rtn4     |
| sp | Q9EP69     | SAC1_MOUSE      | scm1l Kiaa0851 Sac | Sacm1l   |
| sp | P97449     | AMPN_MOUSE      | Anpep Lap-1 Lap1   | Anpep    |
| tr | F6SFF5     | F6SFF5_MOUSE    | Coq9               | Coq9     |
| sp | Q3ULD5     | MCCB_MOUSE      | Mccc2              | Mccc2    |
| sp | P61089     | UBE2N_MOUSE     | Ube2n Blu          | Ube2n    |
| sp | Q9CR68     | UCRI_MOUSE      | Uqcrrs1            | Uqcrrs1  |
| tr | H3BKF4     | H3BKF4_MOUSE    | Gm20708            | Gm20708  |
| tr | Q5SW88     | Q5SW88_MOUSE    | Rab1a Rab1         | Rab1a    |
| tr | G5E8R7     | G5E8R7_MOUSE    | Smyd1              | Smyd1    |
| tr | A0A1W2P8E1 | A1W2P8E1_MOUSE  | Ilvbl              | Ilvbl    |
| sp | Q6PD26     | PIGS_MOUSE      | Pigs               | Pigs     |
| tr | A0A1L1STE6 | A1L1STE6_MOUSE  | Idh3a              | Idh3a    |
| sp | Q55143     | AT2A2_MOUSE     | Atp2a2             | Atp2a2   |
| sp | Q9QWL7     | K1C17_MOUSE     | Krt17 Krt1-17      | Krt17    |
| sp | Q4VAE3     | TMM65_MOUSE     | Tmem65             | Tmem65   |
| sp | Q62165     | DAG1_MOUSE      | Dag1 Dag-1         | Dag1     |
| sp | P19785     | ESR1_MOUSE      | 1 Esr Estr Estr Nr | Esr1     |
| tr | Q3UAM9     | Q3UAM9_MOUSE    | Eng                | Eng      |
| tr | G3X942     | G3X942_MOUSE    | Galnt9 mCG_12954   | Galnt9   |

|    |            |                  |                     |          |
|----|------------|------------------|---------------------|----------|
| tr | G3UZX4     | G3UZX4_MOUSE     | Csnk2b              | Csnk2b   |
| tr | F8WHM5     | F8WHM5_MOUSE     | Glg1                | Glg1     |
| tr | E9PXM6     | E9PXM6_MOUSE     | Slc29a1             | Slc29a1  |
| tr | E9PUE8     | E9PUE8_MOUSE     | Abcc9               | Abcc9    |
| tr | D3Z456     | D3Z456_MOUSE     | Mrpl3 mCG_1474E     | Mrpl3    |
| tr | A0A0R4J2A0 | A0A0R4J2A0_MOUSE | Ssh2                | Ssh2     |
| sp | Q9WTR5     | CAD13_MOUSE      | Cdh13               | Cdh13    |
| sp | Q8BXV2     | BRI3B_MOUSE      | Bri3bp              | Bri3bp   |
| sp | P35762     | CD81_MOUSE       | Cd81 Tapa1          | Cd81     |
| sp | O54962     | BAF_MOUSE        | inf1 Baf Bcrp1 L2bj | Banf1    |
| tr | Z4YN97     | Z4YN97_MOUSE     | Ak1                 | Ak1      |
| tr | Q9D8L3     | Q9D8L3_MOUSE     | Ssr4 mCG_8079       | Ssr4     |
| tr | Q5D073     | Q5D073_MOUSE     | xmp2 mCG_13421      | Pxmp2    |
| tr | F6XWB2     | F6XWB2_MOUSE     | Igkv1-99 Igkv1-11E  | Igkv1-99 |
| tr | F6XCE3     | F6XCE3_MOUSE     | Myl2                | Myl2     |
| tr | D3Z198     | D3Z198_MOUSE     | Mrps17              | Mrps17   |
| tr | D3YY42     | D3YY42_MOUSE     | Yif1b               | Yif1b    |
| tr | A2AMH5     | A2AMH5_MOUSE     | Slc44a1             | Slc44a1  |
| tr | A0A1L1SSA8 | A0A1L1SSA8_MOUSE | Tmem205             | Tmem205  |
| tr | A0A140LIU4 | A0A140LIU4_MOUSE | Cox7a1 mCG_2156     | Cox7a1   |
| tr | A0A0U1RNP6 | A0A0U1RNP6_MOUSE | Tdrd12              | Tdrd12   |
| sp | Q9Z2I9     | SUCB1_MOUSE      | Suc1a2              | Suc1a2   |
| sp | Q9QZQ8     | H2AY_MOUSE       | H2afy               | H2afy    |
| sp | Q9EP72     | EMC7_MOUSE       | Emc7 Orf3           | Emc7     |
| sp | Q9D6J6     | NDUV2_MOUSE      | Ndufv2              | Ndufv2   |
| sp | Q9D3D9     | ATPD_MOUSE       | Atp5f1d Atp5d       | Atp5f1d  |
| sp | Q9CQZ6     | NDUB3_MOUSE      | Ndufb3              | Ndufb3   |
| sp | Q9CQN6     | TM14C_MOUSE      | Tmem14c             | Tmem14c  |
| sp | Q9CQ40     | RM49_MOUSE       | Mrpl49              | Mrpl49   |
| sp | Q99N92     | RM27_MOUSE       | Mrpl27              | Mrpl27   |
| sp | Q99KP6     | PRP19_MOUSE      | Prpf19 Prp19 Snev   | Prpf19   |
| sp | Q99KI3     | EMC3_MOUSE       | Emc3 Tmem111        | Emc3     |
| sp | Q78IK2     | USMG5_MOUSE      | Usmg5 Dapit         | Usmg5    |
| sp | Q61735     | CD47_MOUSE       | Cd47                | Cd47     |
| sp | Q08AU7     | MADL2_MOUSE      | Myadml2             | Myadml2  |
| sp | P62892     | RL39_MOUSE       | Rpl39               | Rpl39    |
| sp | P62274     | RS29_MOUSE       | Rps29               | Rps29    |
| sp | P57716     | NICA_MOUSE       | Ncstn               | Ncstn    |
| sp | P50247     | SAHH_MOUSE       | Ahcy                | Ahcy     |
| sp | P12815     | PDCD6_MOUSE      | Pdcd6 Alg2          | Pdcd6    |
| sp | P01887     | B2MG_MOUSE       | B2m                 | B2m      |
| tr | A2AEY2     | A2AEY2_MOUSE     | Fhl1 mCG_9696       | Fhl1     |
| sp | Q99M71     | EPDR1_MOUSE      | Epdr1 Merp1 M       | Epdr1    |
| sp | Q9JJW5     | MYOZ2_MOUSE      | Myoz2               | Myoz2    |
| sp | Q9EPL8     | IPO7_MOUSE       | Ipo7 Ranbp7         | Ipo7     |
| sp | P61014     | PPLA_MOUSE       | Pln                 | Pln      |
| tr | Q3UN10     | Q3UN10_MOUSE     | Wfs1                | Wfs1     |
| tr | B1B1D8     | B1B1D8_MOUSE     | Mrpl2               | Mrpl2    |
| sp | Q91V01     | MBOA5_MOUSE      | Grcc3f Mboat5 C     | Lpcat3   |
| sp | P62259     | 1433E_MOUSE      | Ywhae               | Ywhae    |

|    |            |                  |                   |         |
|----|------------|------------------|-------------------|---------|
| tr | B1ARW4     | B1ARW4_MOUSE     | Ndufs5            | Ndufs5  |
| sp | P68373     | TBA1C_MOUSE      | Tuba1c Tuba6      | Tuba1c  |
| sp | Q8VDT9     | RM50_MOUSE       | Mrpl50            | Mrpl50  |
| sp | Q9QWK4     | CD5L_MOUSE       | Cd5l Aim Api6     | Cd5l    |
| sp | P17047     | LAMP2_MOUSE      | Lamp2 Lamp-2      | Lamp2   |
| sp | Q6P3A8     | ODBB_MOUSE       | Bckdhb            | Bckdhb  |
| tr | Q3TRE0     | Q3TRE0_MOUSE     | Sspn mCG_15024    | Sspn    |
| sp | Q9CPU2     | NDUB2_MOUSE      | Ndufb2            | Ndufb2  |
| sp | O08749     | DLDH_MOUSE       | Dld               | Dld     |
| sp | P60229     | EIF3E_MOUSE      | Eif3e Eif3s6 Int6 | Eif3e   |
| sp | Q14C51     | PTCD3_MOUSE      | Ptcd3 Mrps39      | Ptcd3   |
| sp | P97370     | AT1B3_MOUSE      | Atp1b3            | Atp1b3  |
| sp | Q8R429     | AT2A1_MOUSE      | Atp2a1            | Atp2a1  |
| sp | Q9CX56     | PSMD8_MOUSE      | Psmc8             | Psmc8   |
| tr | E9PY26     | E9PY26_MOUSE     | Blmh              | Blmh    |
| sp | P11531     | DMD_MOUSE        | Dmd               | Dmd     |
| tr | D3YVV1     | D3YVV1_MOUSE     | Tmem30a           | Tmem30a |
| tr | G3UZG6     | G3UZG6_MOUSE     | Cyb5r1 mCG_5352   | Cyb5r1  |
| tr | Q5RL57     | Q5RL57_MOUSE     | Akap8l mCG_14251  | Akap8l  |
| sp | Q9CQ75     | NDUA2_MOUSE      | Ndufa2            | Ndufa2  |
| tr | A0A0G2JGE1 | A0A0G2JGE1_MOUSE | Kyat3             | Kyat3   |
| sp | P24668     | MPRD_MOUSE       | M6pr 46mpr        | M6pr    |
| sp | P21981     | TGM2_MOUSE       | Tgm2              | Tgm2    |
| sp | P82198     | BGH3_MOUSE       | Tgfb1             | Tgfb1   |
| tr | G3X8U7     | G3X8U7_MOUSE     | Ppp3cb mCG_593E   | Ppp3cb  |
| sp | Q8BFZ3     | ACTBL_MOUSE      | Actb12            | Actb12  |

Significantly differentially enriched proteins (391) in preparations from  $\beta$ -cat $\Delta$ ex3 heart

| Gene names          | Significant | Length | Enrichment log<br>ratio (beta/wt) | Accession  | ID               |
|---------------------|-------------|--------|-----------------------------------|------------|------------------|
| Pdhx                | +           | 501    | 4.1098                            | Q8BKZ9     | ODPX_MOUSE       |
| Dlat                | +           | 642    | 4.1029                            | Q8BMF4     | ODP2_MOUSE       |
| Coq3                | +           | 370    | 4.0101                            | Q8BMS4     | COQ3_MOUSE       |
| Coq6                | +           | 476    | 3.9902                            | Q8R1S0     | COQ6_MOUSE       |
| Ogdhl               | +           | 1029   | 3.6329                            | E9Q7L0     | E9Q7L0_MOUSE     |
| Cpt2 Cpt-2          | +           | 658    | 3.6044                            | P52825     | CPT2_MOUSE       |
| Vcp                 | +           | 806    | 3.4740                            | Q01853     | TERA_MOUSE       |
| Mcpt4 mCG_130832    | +           | 246    | 3.4598                            | Q3UN88     | Q3UN88_MOUSE     |
| Ogdh                | +           | 1019   | 3.2651                            | Z4YJV4     | Z4YJV4_MOUSE     |
| Bckdhb              | +           | 390    | 3.2128                            | Q6P3A8     | ODBB_MOUSE       |
| Aldh2 Ahd-1 Ahd1    | +           | 519    | 3.0859                            | P47738     | ALDH2_MOUSE      |
| Galnt9 mCG_129543   | +           | 604    | 2.9584                            | G3X942     | G3X942_MOUSE     |
| Nid1 Ent            | +           | 1245   | 2.9551                            | P10493     | NID1_MOUSE       |
| Psmb10 Lmp10 Mecl1  | +           | 273    | 2.9345                            | O35955     | PSB10_MOUSE      |
| Ech1                | +           | 327    | 2.9164                            | O35459     | ECH1_MOUSE       |
| Psmb6 Lmp19         | +           | 238    | 2.9118                            | Q60692     | PSB6_MOUSE       |
| Lamb1               | +           | 1834   | 2.9068                            | E9QN70     | E9QN70_MOUSE     |
| Blmh                | +           | 179    | 2.9050                            | E9PY26     | E9PY26_MOUSE     |
| Psm4                | +           | 261    | 2.8703                            | Q9R1P0     | PSA4_MOUSE       |
| Lap3 Lapep          | +           | 519    | 2.8615                            | Q9CPY7     | AMPL_MOUSE       |
| L2hgdh              | +           | 464    | 2.8380                            | Q91YP0     | L2HDH_MOUSE      |
| Csrp3               | +           | 65     | 2.8174                            | A0A140LHC6 | A0A140LHC6_MOUSE |
| Igkv1-99 Igkv1-115  | +           | 120    | 2.8094                            | F6XWB2     | F6XWB2_MOUSE     |
| Psm2 Lmpc3          | +           | 234    | 2.8068                            | P49722     | PSA2_MOUSE       |
| H2-Ab1              | +           | 265    | 2.7746                            | P06342     | HB2Q_MOUSE       |
| I1 Ftl1-ps1 mCG_172 | +           | 183    | 2.7124                            | Q9CPX4     | Q9CPX4_MOUSE     |
| Ssh2                | +           | 1429   | 2.7022                            | A0A0R4J2A0 | A0A0R4J2A0_MOUSE |
| Psm1                | +           | 263    | 2.6714                            | Q9R1P4     | PSA1_MOUSE       |
| Ssbp1 mCG_15097     | +           | 148    | 2.6116                            | Q8R2K3     | Q8R2K3_MOUSE     |
| Psmb7 Mmc14         | +           | 277    | 2.5977                            | P70195     | PSB7_MOUSE       |
| Psm6                | +           | 246    | 2.5874                            | Q9QUM9     | PSA6_MOUSE       |
| Psmb3               | +           | 205    | 2.5855                            | Q9R1P1     | PSB3_MOUSE       |
| Psmb1               | +           | 240    | 2.5850                            | O09061     | PSB1_MOUSE       |
| Aoc3 Vap1           | +           | 765    | 2.5846                            | O70423     | AOC3_MOUSE       |
| Psm7                | +           | 248    | 2.5815                            | Q9Z2U0     | PSA7_MOUSE       |
| Psm3                | +           | 255    | 2.5680                            | O70435     | PSA3_MOUSE       |
| Ighv1-31            | +           | 117    | 2.5411                            | A0A0A6YWK5 | A0A0A6YWK5_MOUSE |
| Lama2               | +           | 3118   | 2.5382                            | Q60675     | LAMA2_MOUSE      |
| Psmb2               | +           | 201    | 2.5267                            | Q9R1P3     | PSB2_MOUSE       |
| Lamb2 Lams          | +           | 1799   | 2.5150                            | Q61292     | LAMB2_MOUSE      |
| h4f;Hist1h4h;Hist1h | +           | 103    | 2.5078                            | P62806     | H4_MOUSE         |
| Dld                 | +           | 509    | 2.4987                            | O08749     | DLDH_MOUSE       |
| Fth1 Fth            | +           | 182    | 2.4783                            | P09528     | FRIH_MOUSE       |
| Pfk1 Pfk-I PfkB     | +           | 780    | 2.4697                            | P12382     | PFKAL_MOUSE      |
| Htra1 Htra Prss11   | +           | 480    | 2.4690                            | Q9R118     | HTRA1_MOUSE      |

|                      |   |      |        |            |                  |
|----------------------|---|------|--------|------------|------------------|
| Echs1                | + | 290  | 2.4612 | Q8BH95     | ECHM_MOUSE       |
| Psmb5                | + | 264  | 2.4587 | O55234     | PSB5_MOUSE       |
| Grp75 Hsp74 Hsp      | + | 679  | 2.4076 | P38647     | GRP75_MOUSE      |
| Psmb4 Lmp3           | + | 264  | 2.4053 | P99026     | PSB4_MOUSE       |
| Glud1 Glud           | + | 558  | 2.4026 | P26443     | DHE3_MOUSE       |
| Kyat3                | + | 194  | 2.3956 | A0A0G2JGE1 | A0A0G2JGE1_MOUSE |
| Gm3839               | + | 333  | 2.3885 | S4R1W1     | S4R1W1_MOUSE     |
| Dbt                  | + | 482  | 2.3693 | P53395     | ODB2_MOUSE       |
| Ighm                 | + | 476  | 2.3414 | A0A075B6A0 | A0A075B6A0_MOUSE |
| Igkv2-137            | + | 120  | 2.3358 | A0A0B4J1H6 | A0A0B4J1H6_MOUSE |
| H2afy                | + | 372  | 2.2989 | Q9QZQ8     | H2AY_MOUSE       |
| Psma5                | + | 241  | 2.2986 | Q9Z2U1     | PSA5_MOUSE       |
| Pdha1 Pdha-1         | + | 390  | 2.2878 | P35486     | ODPA_MOUSE       |
| Ckm Ckmm             | + | 381  | 2.2758 | P07310     | KCRM_MOUSE       |
| Lactb Lact1          | + | 551  | 2.2618 | Q9EP89     | LACTB_MOUSE      |
| H3f3a                | + | 119  | 2.2607 | E0CZ27     | E0CZ27_MOUSE     |
| Dhc1 Dnch1 Dnchc     | + | 4644 | 2.2542 | Q9JHU4     | DYHC1_MOUSE      |
| Acadl                | + | 430  | 2.2293 | A0A0R4J083 | A0A0R4J083_MOUSE |
| Idh3a                | + | 384  | 2.2158 | A0A1L1STE6 | A0A1L1STE6_MOUSE |
| Lamc1                | + | 1607 | 2.2134 | F8VQJ3     | F8VQJ3_MOUSE     |
| Tinagl1              | + | 435  | 2.2120 | H3BJ97     | H3BJ97_MOUSE     |
| Psmb8 Lmp7 Mc13      | + | 276  | 2.1807 | P28063     | PSB8_MOUSE       |
| Lama5                | + | 3718 | 2.1574 | Q61001     | LAMA5_MOUSE      |
| Macrod1 Lrp16        | + | 323  | 2.1573 | Q922B1     | MACD1_MOUSE      |
| Sucla2               | + | 463  | 2.1059 | Q9Z2I9     | SUCB1_MOUSE      |
| Esr Estr Estra Nr3c1 | + | 599  | 2.0986 | P19785     | ESR1_MOUSE       |
| Psm6                 | + | 389  | 2.0934 | Q99JI4     | PSMD6_MOUSE      |
| Ldh1 mCG_1993        | + | 332  | 2.0891 | Q564E2     | Q564E2_MOUSE     |
| Aldh5a1              | + | 523  | 2.0829 | Q8BWF0     | SSDH_MOUSE       |
| Gm20390              | + | 267  | 2.0697 | E9PZF0     | E9PZF0_MOUSE     |
| Rtn3                 | + | 964  | 2.0663 | Q9ES97     | RTN3_MOUSE       |
| Xdh                  | + | 1335 | 2.0624 | Q00519     | XDH_MOUSE        |
| Mybpc3               | + | 1278 | 2.0497 | Q3UIK0     | Q3UIK0_MOUSE     |
| Pzp A2m              | + | 1495 | 2.0486 | Q61838     | PZP_MOUSE        |
| Acadvl               | + | 634  | 2.0462 | B1AR28     | B1AR28_MOUSE     |
| Mrps17               | + | 87   | 2.0440 | D3Z198     | D3Z198_MOUSE     |
| Gpi Gpi1             | + | 558  | 2.0281 | P06745     | G6PI_MOUSE       |
| Lama4                | + | 1816 | 1.9965 | P97927     | LAMA4_MOUSE      |
| Pgk1 Pgk-1           | + | 417  | 1.9823 | P09411     | PGK1_MOUSE       |
| Eci1 Dci             | + | 289  | 1.9774 | P42125     | ECI1_MOUSE       |
| Mb                   | + | 154  | 1.9504 | P04247     | MYG_MOUSE        |
| Idh2                 | + | 452  | 1.9449 | P54071     | IDHP_MOUSE       |
| Ywhaz                | + | 245  | 1.9433 | P63101     | 1433Z_MOUSE      |
| Ldha Ldh-2 Ldh2      | + | 334  | 1.8881 | P16125     | LDHB_MOUSE       |
| Ak1                  | + | 89   | 1.8831 | Z4YN97     | Z4YN97_MOUSE     |
| Prdx5                | + | 213  | 1.8771 | H3BJQ7     | H3BJQ7_MOUSE     |
| Cs                   | + | 464  | 1.8663 | Q9CZU6     | CISY_MOUSE       |
| Aco2                 | + | 780  | 1.8157 | Q99KI0     | ACON_MOUSE       |
| Hsp84 Hsp84-1        | + | 724  | 1.8088 | P11499     | HS90B_MOUSE      |
| Plp1 Plp             | + | 277  | 1.7777 | P60202     | MYPR_MOUSE       |



|                      |   |      |        |            |                  |
|----------------------|---|------|--------|------------|------------------|
| 3anf1 Baf Bcrp1 L2bp | + | 89   | 1.7512 | O54962     | BAF_MOUSE        |
| Man2c1               | + | 1037 | 1.7438 | F8WIE1     | F8WIE1_MOUSE     |
| Flnc Abpl Fln2       | + | 2726 | 1.7174 | Q8VHX6     | FLNC_MOUSE       |
| Gmpr                 | + | 290  | 1.6999 | F6VY18     | F6VY18_MOUSE     |
| Hist2h2ab            | + | 130  | 1.6935 | Q64522     | H2A2B_MOUSE      |
| Idh3g                | + | 393  | 1.6857 | P70404     | IDHG1_MOUSE      |
| Cd5l Aim Api6        | + | 352  | 1.6629 | Q9QWK4     | CD5L_MOUSE       |
| Hadha                | + | 763  | 1.6586 | Q8BMS1     | ECHA_MOUSE       |
| Hadhb                | + | 475  | 1.6078 | Q99JY0     | ECHB_MOUSE       |
| Itga7                | + | 1140 | 1.6025 | Q3TZS3     | Q3TZS3_MOUSE     |
| Ywhae                | + | 255  | 1.6021 | P62259     | 1433E_MOUSE      |
| Nipsnap2 Gbas        | + | 281  | 1.6013 | O55126     | NIPS2_MOUSE      |
| Prkaca Pkaca         | + | 351  | 1.5883 | P05132     | KAPCA_MOUSE      |
| Trim72 Mg53          | + | 477  | 1.5859 | Q1XH17     | TRI72_MOUSE      |
| Got2 Got-2           | + | 430  | 1.5661 | P05202     | AATM_MOUSE       |
| Eng                  | + | 652  | 1.5492 | Q3UAM9     | Q3UAM9_MOUSE     |
| Nid2                 | + | 1403 | 1.5491 | O88322     | NID2_MOUSE       |
| Bag2                 | + | 210  | 1.5434 | Q91YN9     | BAG2_MOUSE       |
| Cd47                 | + | 303  | 1.5417 | Q61735     | CD47_MOUSE       |
| Vps35 Mem3           | + | 796  | 1.5238 | Q9EQH3     | VPS35_MOUSE      |
| Pfkm Pfk-m PfkA      | + | 780  | 1.5211 | P47857-3   | PFKAM_MOUSE      |
| Eno1                 | + | 366  | 1.5154 | Q6PHC1     | Q6PHC1_MOUSE     |
| Smyd1                | + | 456  | 1.4917 | G5E8R7     | G5E8R7_MOUSE     |
| Ipo7 Ranbp7          | + | 1038 | 1.4726 | Q9EPL8     | IPO7_MOUSE       |
| Pcca                 | + | 724  | 1.4657 | Q91ZA3     | PCCA_MOUSE       |
| Pygm                 | + | 842  | 1.4610 | Q9WUB3     | PYGM_MOUSE       |
| Dnaja3 Tid1          | + | 480  | 1.4445 | Q99M87     | DNJA3_MOUSE      |
| Mccc2                | + | 563  | 1.4086 | Q3ULD5     | MCCB_MOUSE       |
| Tgm2                 | + | 686  | 1.3987 | P21981     | TGM2_MOUSE       |
| Pln                  | + | 52   | 1.3753 | P61014     | PPLA_MOUSE       |
| Cryab Crya2          | + | 175  | 1.3713 | P23927     | CRYAB_MOUSE      |
| Mrps35               | + | 320  | 1.3613 | A0A0R4J0L6 | A0A0R4J0L6_MOUSE |
| Cav1 Cav             | + | 178  | 1.3580 | P49817     | CAV1_MOUSE       |
| Ephx1                | + | 455  | 1.3552 | Q9D379     | HYEP_MOUSE       |
| Col4a1               | + | 1562 | 1.3487 | A0A1B0GSI7 | A0A1B0GSI7_MOUSE |
| Tmem65               | + | 234  | 1.3297 | Q4VAE3     | TMM65_MOUSE      |
| Pkm Pk3 Pkm2 Pykm    | + | 531  | 1.3038 | P52480-2   | KPYM_MOUSE       |
| Uqcrb mCG_67985      | + | 111  | 1.3011 | Q9CQB4     | Q9CQB4_MOUSE     |
| Cat Cas-1 Cas1       | + | 527  | 1.2849 | P24270     | CATA_MOUSE       |
| Aldoa Aldo1          | + | 364  | 1.2840 | P05064     | ALDOA_MOUSE      |
| Pccb                 | + | 504  | 1.2636 | E9Q1J7     | E9Q1J7_MOUSE     |
| Gpx4                 | + | 157  | 1.2296 | S4R1E5     | S4R1E5_MOUSE     |
| Fhl2                 | + | 279  | 1.2258 | O70433     | FHL2_MOUSE       |
| Des                  | + | 469  | 1.2201 | P31001     | DESM_MOUSE       |
| Tubb4b Tubb2c        | + | 445  | 1.2055 | P68372     | TBB4B_MOUSE      |
| Glna1 Hbb-bt Hbbt1   | + | 147  | 1.1963 | A8DUK4     | A8DUK4_MOUSE     |
| Pygb                 | + | 843  | 1.1898 | Q8CI94     | PYGB_MOUSE       |
| Coq9                 | + | 270  | 1.1641 | F6SFF5     | F6SFF5_MOUSE     |
| Etfdh                | + | 616  | 1.1479 | Q921G7     | ETFD_MOUSE       |
| Eef1a2 Eef1a1 Stn    | + | 463  | 1.1299 | P62631     | EF1A2_MOUSE      |

|                      |   |       |        |            |                  |
|----------------------|---|-------|--------|------------|------------------|
| Hist1h2bp            | + | 126   | 1.1270 | Q8CGP2     | H2B1P_MOUSE      |
| Tdrd12               | + | 127   | 1.1188 | A0A0U1RNP6 | A0A0U1RNP6_MOUSE |
| Actn2                | + | 894   | 1.1159 | Q9JI91     | ACTN2_MOUSE      |
| Dnajc5 mCG_23060     | + | 167   | 1.1154 | G5E8T0     | G5E8T0_MOUSE     |
| Bdh1 Bdh             | + | 343   | 1.1076 | Q80XN0     | BDH_MOUSE        |
| h1a1 Ahd-2 Ahd2 Alc  | + | 501   | 1.1006 | P24549     | AL1A1_MOUSE      |
| Cavin2 Sdpr Sdr      | + | 418   | 1.0817 | Q63918     | CAVN2_MOUSE      |
| Cyb5r1 mCG_5352      | + | 176   | 1.0773 | G3UZG6     | G3UZG6_MOUSE     |
| Mgst3                | + | 153   | 1.0676 | Q9CPU4     | MGST3_MOUSE      |
| Naalad2 mCG_4774     | + | 778   | 1.0447 | G3UWC2     | G3UWC2_MOUSE     |
| Ndufa6               | + | 131   | 1.0155 | Q9CQZ5     | NDUA6_MOUSE      |
| Dmd                  | + | 3678  | 1.0089 | P11531     | DMD_MOUSE        |
| Hspa8 Hsc70 Hsc73    | + | 646   | 1.0088 | P63017     | HSP7C_MOUSE      |
| Myoz2                | + | 264   | 1.0087 | Q9JJW5     | MYOZ2_MOUSE      |
| Fhl1 mCG_9696        | + | 323   | 1.0064 | A2AEY2     | A2AEY2_MOUSE     |
| Entpd2 Cd39I1        | + | 495   | 0.9697 | O55026     | ENTP2_MOUSE      |
| Prdx1                | + | 176   | 0.9655 | B1AXW6     | B1AXW6_MOUSE     |
| Gys1                 | + | 674   | 0.9650 | A0A1B0GT92 | A0A1B0GT92_MOUSE |
| Samm50               | + | 469   | 0.9593 | Q8BGH2     | SAM50_MOUSE      |
| Tpi1 Tpi             | + | 299   | 0.9583 | P17751     | TPIS_MOUSE       |
| Sdha                 | + | 664   | 0.9492 | Q8K2B3     | SDHA_MOUSE       |
| Phb2 Bap Bcap37 Rec  | + | 299   | 0.9354 | O35129     | PHB2_MOUSE       |
| Cavin1 Ptrf          | + | 392   | 0.9267 | O54724     | CAVN1_MOUSE      |
| Itgb1                | + | 798   | 0.9229 | P09055     | ITB1_MOUSE       |
| Ehd2                 | + | 543   | 0.9182 | Q8BH64     | EHD2_MOUSE       |
| Gstm2                | + | 184   | 0.9170 | D3YX76     | D3YX76_MOUSE     |
| Ttn                  | + | 35213 | 0.9112 | A2ASS6     | TITIN_MOUSE      |
| Ptcd3 Mrps39         | + | 685   | 0.9012 | Q14C51     | PTCD3_MOUSE      |
| Ndufs7               | + | 224   | 0.8814 | Q9DC70     | NDUS7_MOUSE      |
| Ahcy                 | + | 432   | 0.8622 | P50247     | SAHH_MOUSE       |
| Rtn4                 | + | 375   | 0.8585 | Q8BHF5     | Q8BHF5_MOUSE     |
| globin alpha 1 haema | + | 142   | 0.8533 | Q91VB8     | Q91VB8_MOUSE     |
| Jup                  | + | 745   | 0.8501 | Q02257     | PLAK_MOUSE       |
| Vdac3                | + | 284   | 0.8285 | J3QMG3     | J3QMG3_MOUSE     |
| Mrpl21 D9Wsu149      | + | 209   | 0.8160 | Q9D1N9     | RM21_MOUSE       |
| Ndufs2               | + | 437   | 0.8160 | D3YXT0     | D3YXT0_MOUSE     |
| Vdac1 Vdac5          | + | 296   | 0.8078 | Q60932     | VDAC1_MOUSE      |
| Tuba1c Tuba6         | + | 449   | 0.8045 | P68373     | TBA1C_MOUSE      |
| Ndufa5               | + | 116   | 0.7993 | Q9CPP6     | NDUA5_MOUSE      |
| Reep5 mCG_121499     | + | 189   | 0.7866 | G3X8R0     | G3X8R0_MOUSE     |
| Mrpl13               | + | 178   | 0.7861 | Q9D1P0     | RM13_MOUSE       |
| Mtch2                | + | 312   | 0.7831 | Q9D050     | Q9D050_MOUSE     |
| Csnk2b               | + | 257   | 0.7793 | G3UZX4     | G3UZX4_MOUSE     |
| Dsp                  | + | 2883  | 0.7608 | E9Q557     | DESP_MOUSE       |
| Csnk2a1 Ckiiia       | + | 391   | 0.7459 | Q60737     | CSK21_MOUSE      |
| Tgfb1                | + | 683   | 0.7401 | P82198     | BGH3_MOUSE       |
| sd1 D10Ertd214e Zcc  | + | 108   | 0.7379 | Q91WS0     | CISD1_MOUSE      |
| Sgca                 | + | 387   | 0.7277 | P82350     | SGCA_MOUSE       |
| Ugp2                 | + | 508   | 0.7158 | Q91ZJ5     | UGPA_MOUSE       |
| Slc16a1 Mct1         | + | 493   | 0.7145 | P53986     | MOT1_MOUSE       |

|                      |   |      |         |            |                  |
|----------------------|---|------|---------|------------|------------------|
| Ptgfrn Fprp          | + | 879  | 0.7145  | Q9WV91     | FPRP_MOUSE       |
| Ndufa9               | + | 373  | 0.7120  | A0A0R3P9C8 | A0A0R3P9C8_MOUSE |
| Stom Epb7.2 Epb72    | + | 284  | 0.6857  | P54116     | STOM_MOUSE       |
| Mtx2 MNCb-0780       | + | 263  | 0.6442  | O88441     | MTX2_MOUSE       |
| Slc44a2 Ctl2         | + | 706  | 0.5835  | Q8BY89     | CTL2_MOUSE       |
| Ndufs3               | + | 263  | 0.5574  | Q9DCT2     | NDUS3_MOUSE      |
| Jr1 Epdr2 Merp1 Mei  | + | 224  | 0.5488  | Q99M71     | EPDR1_MOUSE      |
| Arl8a                | + | 165  | 0.5311  | F6QKK2     | F6QKK2_MOUSE     |
| Alb Alb-1 Alb1       | + | 608  | 0.5223  | P07724     | ALBU_MOUSE       |
| Mdh2 Mor1            | + | 338  | 0.5211  | P08249     | MDHM_MOUSE       |
| Dpep1 Mbd1 Rdp       | + | 410  | 0.5190  | P31428     | DPEP1_MOUSE      |
| Sacm1l Kiaa0851 Sac  | + | 587  | 0.4875  | Q9EP69     | SAC1_MOUSE       |
| Prdx2 Tdpx1 Tpx      | + | 198  | 0.4494  | Q61171     | PRDX2_MOUSE      |
| Rps27a Uba80 Ubcep   | + | 156  | 0.4488  | P62983     | RS27A_MOUSE      |
| Fitm1 Fit1           | + | 292  | 0.4422  | Q91V79     | FITM1_MOUSE      |
| Sgcb                 | + | 320  | 0.4283  | P82349     | SGCB_MOUSE       |
| Camk2a               | + | 489  | 0.3876  | F8WIS9     | F8WIS9_MOUSE     |
| Rtn2 Nspl1           | + | 471  | 0.3439  | O70622     | RTN2_MOUSE       |
| Acaa2                | + | 397  | -0.2803 | Q8BWT1     | THIM_MOUSE       |
| Casq2                | + | 418  | -0.3657 | F6QYE1     | F6QYE1_MOUSE     |
| Ckmt2                | + | 419  | -0.4170 | Q6P8J7     | KCRS_MOUSE       |
| Col6a6               | + | 2265 | -0.4329 | E9Q6A6     | E9Q6A6_MOUSE     |
| Tmx2 Txndc14         | + | 295  | -0.4984 | Q9D710     | TMX2_MOUSE       |
| Psmd2                | + | 908  | -0.5293 | Q8VDM4     | PSMD2_MOUSE      |
| Ap2a2 Adtab          | + | 938  | -0.6093 | P17427     | AP2A2_MOUSE      |
| Ndufa4               | + | 49   | -0.6178 | A0A0N4SVQ1 | A0A0N4SVQ1_MOUSE |
| Atp6v0a1             | + | 838  | -0.6295 | K3W4T3     | K3W4T3_MOUSE     |
| Erlin2 Spfh2         | + | 340  | -0.6311 | Q8BFZ9     | ERLIN2_MOUSE     |
| Uqcrc2               | + | 453  | -0.6351 | Q9DB77     | QCR2_MOUSE       |
| Atp5c1               | + | 274  | -0.6399 | Q8C2Q8     | Q8C2Q8_MOUSE     |
| Cct3 Cctg            | + | 545  | -0.6545 | P80318     | TCPG_MOUSE       |
| Atp2a2               | + | 1044 | -0.6705 | O55143     | AT2A2_MOUSE      |
| Apmmap               | + | 415  | -0.6790 | Q9D7N9     | APMAP_MOUSE      |
| Cox7a1 mCG_21566     | + | 89   | -0.6813 | A0A140LIU4 | A0A140LIU4_MOUSE |
| Slc25a3 mCG_10343    | + | 358  | -0.7164 | G5E902     | G5E902_MOUSE     |
| Pdcd6 Alg2           | + | 191  | -0.7419 | P12815     | PDCD6_MOUSE      |
| Gnb2                 | + | 382  | -0.7542 | E9QKR0     | E9QKR0_MOUSE     |
| Tep1 Tp1             | + | 2629 | -0.7824 | P97499     | TEP1_MOUSE       |
| Atp1a2               | + | 1020 | -0.8155 | Q6PIE5     | AT1A2_MOUSE      |
| Rpn1                 | + | 608  | -0.8393 | Q91YQ5     | RPN1_MOUSE       |
| Tmed7                | + | 188  | -0.8637 | E9Q7G1     | E9Q7G1_MOUSE     |
| Tmem38a              | + | 298  | -0.8673 | Q3TMP8     | TM38A_MOUSE      |
| Ces1d Ces1 Ces3      | + | 565  | -0.8699 | Q8VCT4     | CES1D_MOUSE      |
| Tm9sf2               | + | 662  | -0.8750 | P58021     | TM9S2_MOUSE      |
| Cct7                 | + | 502  | -0.8783 | A0A0N4SV00 | A0A0N4SV00_MOUSE |
| Lat1 Alcat1 Gm91 Lyc | + | 376  | -0.9030 | Q3UN02     | LCLT1_MOUSE      |
| Lman2                | + | 358  | -0.9481 | Q9DBH5     | LMAN2_MOUSE      |
| Ddost                | + | 441  | -0.9538 | O54734     | OST48_MOUSE      |
| Myh13                | + | 1938 | -0.9544 | B1AR69     | B1AR69_MOUSE     |
| Cacna2d1             | + | 1091 | -0.9766 | E9Q1X8     | E9Q1X8_MOUSE     |

|                        |   |      |         |            |                  |
|------------------------|---|------|---------|------------|------------------|
| Cct8                   | + | 489  | -0.9896 | H3BL49     | H3BL49_MOUSE     |
| Arpc2                  | + | 300  | -0.9983 | Q9CVB6     | ARPC2_MOUSE      |
| Emc3 Tmem111           | + | 261  | -1.0256 | Q99KI3     | EMC3_MOUSE       |
| Ryr2                   | + | 4966 | -1.0510 | F6U7V1     | F6U7V1_MOUSE     |
| Tcp1 Cct1 Ccta         | + | 556  | -1.0733 | P11983     | TCPA_MOUSE       |
| Tmed4                  | + | 170  | -1.0835 | Q5SVW9     | Q5SVW9_MOUSE     |
| Emc1 Kiaa0090          | + | 997  | -1.0915 | Q8C7X2     | EMC1_MOUSE       |
| Atp5o D12Wsu28e        | + | 213  | -1.0982 | Q9DB20     | ATPO_MOUSE       |
| Hist1h1d H1f3          | + | 221  | -1.0985 | P43277     | H13_MOUSE        |
| Lmf1                   | + | 574  | -1.1219 | Z4YJR1     | Z4YJR1_MOUSE     |
| Agpat3 Lpaat3          | + | 376  | -1.1243 | Q9D517     | PLCC_MOUSE       |
| Emc2 Kiaa0103 Ttc35    | + | 297  | -1.1373 | Q9CRD2     | EMC2_MOUSE       |
| Atp1a1                 | + | 1023 | -1.1466 | Q8VDN2     | AT1A1_MOUSE      |
| Nceh1 Aadac1 Kiaa134   | + | 408  | -1.1495 | Q8BLF1     | NCEH1_MOUSE      |
| Slc27a1 Fatp Fatp1     | + | 646  | -1.1702 | Q60714     | S27A1_MOUSE      |
| Hhatl Gup1 Kiaa1173    | + | 503  | -1.1813 | Q9D1G3     | HHATL_MOUSE      |
| Cdh13                  | + | 714  | -1.1936 | Q9WTR5     | CAD13_MOUSE      |
| Myh6 Myhca             | + | 1938 | -1.2190 | Q02566     | MYH6_MOUSE       |
| Emc7 Orf3              | + | 241  | -1.2636 | Q9EP72     | EMC7_MOUSE       |
| Canx                   | + | 591  | -1.2745 | P35564     | CALX_MOUSE       |
| Cct2 Cctb              | + | 535  | -1.3004 | P80314     | TCPB_MOUSE       |
| Akap8l mCG_14258       | + | 641  | -1.3108 | Q5RL57     | Q5RL57_MOUSE     |
| Tmco1                  | + | 200  | -1.3311 | A0A0A6YVS2 | A0A0A6YVS2_MOUSE |
| Purb                   | + | 324  | -1.3690 | Q35295     | PURB_MOUSE       |
| Pigs                   | + | 555  | -1.4212 | Q6PD26     | PIGS_MOUSE       |
| Lnpep                  | + | 1025 | -1.4310 | Q8C129     | LCAP_MOUSE       |
| Pm20d1                 | + | 503  | -1.4322 | Q8C165     | P20D1_MOUSE      |
| Fabp3 Fabph1           | + | 133  | -1.4529 | P11404     | FABPH_MOUSE      |
| Tmed10 Tmp21           | + | 219  | -1.4536 | Q9D1D4     | TMEDA_MOUSE      |
| Cct6a Cct6 Cctz1       | + | 531  | -1.4953 | P80317     | TCPZ_MOUSE       |
| C1qtnf9                | + | 333  | -1.5074 | Q4ZJN1     | C1QT9_MOUSE      |
| Btf3l4                 | + | 158  | -1.6042 | Q9CQH7     | BT3L4_MOUSE      |
| Arpc4 Arc20            | + | 168  | -1.6426 | P59999     | ARPC4_MOUSE      |
| Bri3bp                 | + | 253  | -1.6478 | Q8BXV2     | BRI3B_MOUSE      |
| Atp5f1a Atp5a1         | + | 553  | -1.6719 | Q03265     | ATPA_MOUSE       |
| Rpl28                  | + | 137  | -1.7194 | P41105     | RL28_MOUSE       |
| tco2 COII COX2 mt-COII | + | 227  | -1.8520 | P00405     | COX2_MOUSE       |
| Hspa5 Grp78            | + | 655  | -1.8558 | P20029     | GRP78_MOUSE      |
| Aspn                   | + | 373  | -1.8669 | Q99MQ4     | ASPN_MOUSE       |
| Pacsin3                | + | 424  | -1.9030 | Q99JB8     | PACN3_MOUSE      |
| Capza2 Cappa2          | + | 286  | -1.9515 | P47754     | CAZA2_MOUSE      |
| Arpc5l                 | + | 153  | -1.9917 | Q9D898     | ARP5L_MOUSE      |
| Atp6v0d1 Atp6d         | + | 351  | -2.0168 | P51863     | VA0D1_MOUSE      |
| Rps15                  | + | 118  | -2.0568 | D3YTQ9     | D3YTQ9_MOUSE     |
| Actbl2                 | + | 376  | -2.0846 | Q8BFZ3     | ACTBL_MOUSE      |
| Phkb                   | + | 1085 | -2.1200 | Q7TSH2     | KPBB_MOUSE       |
| Naca                   | + | 215  | -2.1234 | Q60817     | NACA_MOUSE       |
| Pura                   | + | 321  | -2.1381 | P42669     | PURA_MOUSE       |
| Parp4                  | + | 1969 | -2.1428 | E9PYK3     | E9PYK3_MOUSE     |
| Phka1                  | + | 1182 | -2.1645 | A2AI91     | A2AI91_MOUSE     |

|                     |   |      |         |            |                  |
|---------------------|---|------|---------|------------|------------------|
| Tnnc1               | + | 106  | -2.1664 | E9Q8P0     | E9Q8P0_MOUSE     |
| Ilvbl               | + | 596  | -2.1796 | A0A1W2P8E1 | A0A1W2P8E1_MOUSE |
| Actr1a Ctrn1        | + | 376  | -2.2263 | P61164     | ACTZ_MOUSE       |
| Myl3 Mlc1v Mylc     | + | 204  | -2.2313 | P09542     | MYL3_MOUSE       |
| Prps1l3             | + | 318  | -2.2371 | G3UXL2     | G3UXL2_MOUSE     |
| Srl Sar             | + | 910  | -2.2762 | Q7TQ48     | SRCA_MOUSE       |
| Myl6                | + | 158  | -2.2796 | A0A1W2P7Q9 | A0A1W2P7Q9_MOUSE |
| Rps12 mCG_132913    | + | 132  | -2.3082 | Q6ZWZ6     | Q6ZWZ6_MOUSE     |
| Myh9                | + | 1960 | -2.3159 | Q8VDD5     | MYH9_MOUSE       |
| Dnpep               | + | 475  | -2.4278 | Q3TVK3     | Q3TVK3_MOUSE     |
| Tfrc Trfr           | + | 763  | -2.4463 | Q62351     | TFR1_MOUSE       |
| Myh14               | + | 2000 | -2.4666 | Q6URW6-3   | MYH14_MOUSE      |
| Rpl26               | + | 145  | -2.4864 | P61255     | RL26_MOUSE       |
| Btf3                | + | 204  | -2.5145 | Q64152     | BTF3_MOUSE       |
| Tnni3               | + | 211  | -2.5764 | P48787     | TNNI3_MOUSE      |
| Uqcrfs1             | + | 274  | -2.6115 | Q9CR68     | UCRI_MOUSE       |
| Myh11               | + | 1938 | -2.6128 | E9QPE7     | E9QPE7_MOUSE     |
| Lman1 Ergic53       | + | 517  | -2.6782 | Q9D0F3     | LMAN1_MOUSE      |
| Tpp2                | + | 1262 | -2.6937 | Q64514     | TPP2_MOUSE       |
| Rps26               | + | 115  | -2.7659 | P62855     | RS26_MOUSE       |
| Rpl30               | + | 115  | -2.7942 | P62889     | RL30_MOUSE       |
| Capzb Cappb1        | + | 277  | -2.8065 | P47757     | CAPZB_MOUSE      |
| Rpl37a              | + | 92   | -2.8084 | P61514     | RL37A_MOUSE      |
| Atp5f1d Atp5d       | + | 168  | -2.9297 | Q9D3D9     | ATPD_MOUSE       |
| Nnt                 | + | 1086 | -2.9453 | Q61941     | NNTM_MOUSE       |
| 2900073G15Rik mC    | + | 172  | -2.9549 | Q6ZWQ9     | Q6ZWQ9_MOUSE     |
| Rps9                | + | 194  | -2.9864 | Q6ZWN5     | RS9_MOUSE        |
| ack1 Gnb2-rs1 Gnb2l | + | 317  | -3.2095 | P68040     | RACK1_MOUSE      |
| Rpl36a Rpl44        | + | 106  | -3.2234 | P83882     | RL36A_MOUSE      |
| Actg2 Acta3 Actsg   | + | 376  | -3.3905 | P63268     | ACTH_MOUSE       |
| Rpl18a              | + | 147  | -3.4019 | A0A1D5RLW5 | A0A1D5RLW5_MOUSE |
| Gm10073             | + | 114  | -3.5222 | E9Q3T0     | E9Q3T0_MOUSE     |
| Rps17               | + | 135  | -3.5435 | P63276     | RS17_MOUSE       |
| Atp5f1b Atp5b       | + | 529  | -3.5537 | P56480     | ATPB_MOUSE       |
| Rps27               | + | 83   | -3.5728 | A0A0G2JG29 | A0A0G2JG29_MOUSE |
| Rpl3                | + | 403  | -3.6222 | P27659     | RL3_MOUSE        |
| Rps4x Rps4          | + | 263  | -3.6711 | P62702     | RS4X_MOUSE       |
| mCG_121646 mCG_     | + | 160  | -3.7029 | Q9CQM8     | Q9CQM8_MOUSE     |
| Rpl3l               | + | 407  | -3.7065 | E9PWZ3     | E9PWZ3_MOUSE     |
| Rps2 Lrep3 Rps4     | + | 293  | -3.7486 | P25444     | RS2_MOUSE        |
|                     | + | NaN  | -3.7738 | E9QAZ2     | E9QAZ2_MOUSE     |
| Rps15a              | + | 130  | -3.7741 | P62245     | RS15A_MOUSE      |
| Rpl32               | + | 135  | -3.7987 | P62911     | RL32_MOUSE       |
| Rpl5                | + | 297  | -3.8025 | P47962     | RL5_MOUSE        |
| Acta1 Acta          | + | 377  | -3.8833 | P68134     | ACTS_MOUSE       |
| Rps27l              | + | 77   | -3.9415 | D6RH49     | D6RH49_MOUSE     |
| Rpl35               | + | 123  | -4.1435 | Q6ZWV7     | RL35_MOUSE       |
| Tpm1 Tpm-1 Tpm      | + | 284  | -4.1631 | P58771     | TPM1_MOUSE       |
| Rps24               | + | 118  | -4.1738 | A0A286YEB7 | A0A286YEB7_MOUSE |
| Rps23               | + | 143  | -4.1813 | P62267     | RS23_MOUSE       |

|                     |   |      |         |            |                  |
|---------------------|---|------|---------|------------|------------------|
| Rps29               | + | 56   | -4.1865 | P62274     | RS29_MOUSE       |
| Rpl24               | + | 157  | -4.2035 | Q8BP67     | RL24_MOUSE       |
| Tnnt2               | + | 302  | -4.2333 | Q6P3Z7     | Q6P3Z7_MOUSE     |
| Metap2 METAP2       | + | 488  | -4.2694 | Q3UI33     | Q3UI33_MOUSE     |
| Rps11               | + | 158  | -4.2707 | P62281     | RS11_MOUSE       |
| Rpl7                | + | 270  | -4.2774 | P14148     | RL7_MOUSE        |
| Rpl38               | + | 70   | -4.2821 | Q9JJI8     | RL38_MOUSE       |
| Rpl6                | + | 296  | -4.2898 | P47911     | RL6_MOUSE        |
| Rps3a Rps3a1        | + | 264  | -4.3293 | P97351     | RS3A_MOUSE       |
| Gm9493              | + | 192  | -4.3976 | F6SVV1     | F6SVV1_MOUSE     |
| Rps25               | + | 93   | -4.4060 | A0A1L1SQA8 | A0A1L1SQA8_MOUSE |
| Rpl22               | + | 128  | -4.4327 | P67984     | RL22_MOUSE       |
| Rpl27               | + | 136  | -4.4536 | P61358     | RL27_MOUSE       |
| Rpl39               | + | 51   | -4.4758 | P62892     | RL39_MOUSE       |
| Rpl8                | + | 257  | -4.4841 | P62918     | RL8_MOUSE        |
| Rpl36 mCG_20352     | + | 105  | -4.4950 | Q6ZWZ4     | Q6ZWZ4_MOUSE     |
| u Gm9843 mCG_117    | + | 133  | -4.5989 | Q642K5     | Q642K5_MOUSE     |
| m11361 mCG_11667    | + | 152  | -4.7011 | A0A1Y7VKY1 | A0A1Y7VKY1_MOUSE |
| Rpl7a Surf-3 Surf3  | + | 266  | -4.7201 | P12970     | RL7A_MOUSE       |
| Rps13 mCG_123365    | + | 140  | -4.7383 | Q921R2     | Q921R2_MOUSE     |
| i mCG_123122 mCG_   | + | 217  | -4.8183 | Q5XJF6     | Q5XJF6_MOUSE     |
| Rps3                | + | 243  | -4.8244 | P62908     | RS3_MOUSE        |
| Rpl9                | + | 191  | -4.9191 | A0A0G2JES3 | A0A0G2JES3_MOUSE |
| Rpl31               | + | 125  | -4.9269 | P62900     | RL31_MOUSE       |
| Rps19               | + | 145  | -4.9848 | Q9CZX8     | RS19_MOUSE       |
| Rps20               | + | 119  | -5.0665 | P60867     | RS20_MOUSE       |
| Rps8                | + | 208  | -5.1370 | P62242     | RS8_MOUSE        |
| l10 RP23-436K3.4-0f | + | 201  | -5.1404 | I7HLV2     | I7HLV2_MOUSE     |
| Rpl12               | + | 165  | -5.1819 | P35979     | RL12_MOUSE       |
|                     | + | NaN  | -5.1846 | A0A140T8M7 | A0A140T8M7_MOUSE |
| Rps14               | + | 151  | -5.2275 | P62264     | RS14_MOUSE       |
| Rps16               | + | 146  | -5.2992 | P14131     | RS16_MOUSE       |
| pl13a P198 Tstap198 | + | 203  | -5.3246 | P19253     | RL13A_MOUSE      |
| Rpl23               | + | 140  | -5.4155 | P62830     | RL23_MOUSE       |
| Rps5 mCG_22552      | + | 204  | -5.4256 | Q91V55     | Q91V55_MOUSE     |
| Rpl18               | + | 159  | -5.4547 | A0A1B0GQU8 | A0A1B0GQU8_MOUSE |
| Rpsa Lamr1 P40-8    | + | 295  | -5.4677 | P14206     | RSSA_MOUSE       |
| Rpl4                | + | 419  | -5.5740 | Q9D8E6     | RL4_MOUSE        |
| Rpl13               | + | 211  | -5.6277 | P47963     | RL13_MOUSE       |
| Rplp0 Arbp          | + | 317  | -5.6877 | P14869     | RLA0_MOUSE       |
| Rps10               | + | 154  | -5.7804 | Q3UW83     | Q3UW83_MOUSE     |
| Rps6                | + | 249  | -5.8448 | P62754     | RS6_MOUSE        |
| Rpl27a              | + | 148  | -5.8890 | P14115     | RL27A_MOUSE      |
| Rpl17               | + | 184  | -5.9614 | Q9CPR4     | RL17_MOUSE       |
| Rpl14               | + | 217  | -6.0021 | Q9CR57     | RL14_MOUSE       |
| Rps28               | + | 56   | -6.0562 | G3UYV7     | G3UYV7_MOUSE     |
| T                   | C | N    | N       | T          | T                |
| Prpf19 Prp19 Snev   |   | 504  | 2.0451  | Q99KP6     | PRP19_MOUSE      |
| Hspg2               |   | 4383 | 1.5194  | E9PZ16     | E9PZ16_MOUSE     |
| Hmgb3               |   | 159  | 1.2337  | A2AP78     | A2AP78_MOUSE     |

|                     |      |        |            |                  |
|---------------------|------|--------|------------|------------------|
| Popdc2              | 371  | 1.0543 | Q6P3F7     | Q6P3F7_MOUSE     |
| Myl2                | 62   | 1.0307 | F6XCE3     | F6XCE3_MOUSE     |
| Sdhb                | 282  | 1.0166 | Q9CQA3     | SDHB_MOUSE       |
| Wnt3a Wnt-3a        | 352  | 0.9863 | P27467     | WNT3A_MOUSE      |
| Got1                | 413  | 0.8448 | P05201     | AATC_MOUSE       |
| Cavin3 Prkcdbp Srbc | 260  | 0.8169 | Q91VJ2     | CAVN3_MOUSE      |
| Anxa4 Anx4          | 319  | 0.7753 | P97429     | ANXA4_MOUSE      |
| Igha                | 389  | 0.7456 | AOA0A6YXW6 | AOA0A6YXW6_MOUSE |
| Anpep Lap-1 Lap1    | 966  | 0.7312 | P97449     | AMPN_MOUSE       |
| Vdac2 Vdac6         | 295  | 0.6834 | Q60930     | VDAC2_MOUSE      |
| Ppib                | 216  | 0.6607 | P24369     | PIIB_MOUSE       |
| Dlst                | 454  | 0.6574 | Q9D2G2     | ODO2_MOUSE       |
| Maob                | 520  | 0.6500 | Q8BW75     | AOFB_MOUSE       |
| Mpc2 Brp44          | 127  | 0.6287 | Q9D023     | MPC2_MOUSE       |
| Cpt1a Cpt-1 Cpt1    | 773  | 0.6267 | P97742     | CPT1A_MOUSE      |
| Rac1 mCG_23557      | 211  | 0.5938 | Q3TLP8     | Q3TLP8_MOUSE     |
| Ssr4 mCG_8079       | 173  | 0.5603 | Q9D8L3     | Q9D8L3_MOUSE     |
| Immt                | 679  | 0.5533 | E9Q800     | E9Q800_MOUSE     |
| Ndufa13 Grim19      | 144  | 0.5387 | Q9ERS2     | NDUAD_MOUSE      |
| Igf2r               | 2483 | 0.5370 | Q07113     | MPRI_MOUSE       |
| Sgcg                | 291  | 0.5368 | P82348     | SGCG_MOUSE       |
| Dhrs4 D14Ucla2      | 279  | 0.5359 | Q99LB2     | DHRS4_MOUSE      |
| Mtco1 COI mt-Co1    | 514  | 0.5253 | P00397     | COX1_MOUSE       |
| Usmg5 Dapit         | 58   | 0.4902 | Q78IK2     | USMG5_MOUSE      |
| Phb                 | 272  | 0.4897 | P67778     | PHB_MOUSE        |
| Gm20708             | 155  | 0.4646 | H3BKF4     | H3BKF4_MOUSE     |
| Mrpl17              | 176  | 0.4631 | Q9D8P4     | RM17_MOUSE       |
| Mtnd1 mt-Nd1 Nd1    | 318  | 0.4601 | P03888     | NU1M_MOUSE       |
| Eif3e Eif3s6 Int6   | 445  | 0.4585 | P60229     | EIF3E_MOUSE      |
| Ppp3cb mCG_5935     | 515  | 0.4565 | G3X8U7     | G3X8U7_MOUSE     |
| Ndufv1              | 455  | 0.4507 | D3YUM1     | D3YUM1_MOUSE     |
| Slc25a4 Anc1 Ant1   | 298  | 0.4467 | P48962     | ADT1_MOUSE       |
| Myadm               | 81   | 0.4328 | AOA0N4SW94 | AOA0N4SW94_MOUSE |
| Mrps30              | 442  | 0.4219 | Q9D0G0     | RT30_MOUSE       |
| Atp1b1 Atp4b        | 304  | 0.4212 | P14094     | AT1B1_MOUSE      |
| Hmgb1               | 211  | 0.4198 | A0A0J9YUZ4 | A0A0J9YUZ4_MOUSE |
| Ndufa2              | 99   | 0.4195 | Q9CQ75     | NDUA2_MOUSE      |
| Mvp                 | 870  | 0.4119 | E9Q3X0     | E9Q3X0_MOUSE     |
| Psmd12              | 436  | 0.4058 | B1AT36     | B1AT36_MOUSE     |
| Mrpl22              | 206  | 0.4056 | Q8BU88     | RM22_MOUSE       |
| Cycs                | 105  | 0.3948 | P62897     | CYC_MOUSE        |
| Slc25a5 Ant2        | 298  | 0.3875 | P51881     | ADT2_MOUSE       |
| Cpt1b               | 772  | 0.3824 | Q924X2     | CPT1B_MOUSE      |
| F13a1 F13a          | 732  | 0.3770 | Q8BH61     | F13A_MOUSE       |
| Slc25a13 Aralar2    | 676  | 0.3646 | Q9QXX4     | CMC2_MOUSE       |
| Cox6b1 Cox6b        | 86   | 0.3642 | P56391     | CX6B1_MOUSE      |
| Anxa11 Anx11        | 503  | 0.3617 | P97384     | ANX11_MOUSE      |
| Sccpdh              | 429  | 0.3520 | Q8R127     | SCPD_MOUSE       |
| Mrpl15              | 295  | 0.3413 | Q9CPR5     | RM15_MOUSE       |
| Atp5l               | 103  | 0.3407 | Q9CPQ8     | ATP5L_MOUSE      |

|                       |      |        |            |                  |
|-----------------------|------|--------|------------|------------------|
| Abcc9                 | 1533 | 0.3384 | E9PUE8     | E9PUE8_MOUSE     |
| Cyb5r3                | 313  | 0.3301 | F2Z456     | F2Z456_MOUSE     |
| Ube2n Blu             | 152  | 0.3224 | P61089     | UBE2N_MOUSE      |
| Cox5a                 | 146  | 0.3192 | P12787     | COX5A_MOUSE      |
| Bcam Gplu Lu          | 622  | 0.3172 | Q9R069     | BCAM_MOUSE       |
| Mtnd4 mt-Nd4 Nd4      | 459  | 0.3099 | P03911     | NU4M_MOUSE       |
| ipoq Acdc Acrp30 Apm1 | 247  | 0.3024 | Q60994     | ADIPO_MOUSE      |
| ³smd3 P91a Tstap91a   | 530  | 0.2927 | P14685     | PSMD3_MOUSE      |
| Sgcd                  | 289  | 0.2869 | P82347     | SGCD_MOUSE       |
| Rdh14                 | 334  | 0.2849 | Q9ERI6     | RDH14_MOUSE      |
| Tmem33                | 246  | 0.2800 | A0A0R4J1Z3 | A0A0R4J1Z3_MOUSE |
| Atp5j2                | 76   | 0.2716 | F8WHP8     | F8WHP8_MOUSE     |
| Mrpl50                | 159  | 0.2703 | Q8VDT9     | RM50_MOUSE       |
| Ndufb3                | 104  | 0.2699 | Q9CQZ6     | NDUB3_MOUSE      |
| Mrpl18                | 180  | 0.2608 | Q9CQL5     | RM18_MOUSE       |
| Ndufb7                | 137  | 0.2484 | Q9CR61     | NDUB7_MOUSE      |
| tp5i Atp5k Lfm-1 Lfm1 | 71   | 0.2455 | Q06185     | ATP5I_MOUSE      |
| Acs1                  | 699  | 0.2452 | D3Z041     | D3Z041_MOUSE     |
| Ndufs8                | 212  | 0.2424 | Q8K3J1     | NDUS8_MOUSE      |
| Myom1                 | 1569 | 0.2417 | Z4YJF5     | Z4YJF5_MOUSE     |
| Rab1a Rab1            | 202  | 0.2384 | Q5SW88     | Q5SW88_MOUSE     |
| Mrpl49                | 166  | 0.2329 | Q9CQ40     | RM49_MOUSE       |
| Sptbn1                | 2092 | 0.2278 | A0A0A0MQG2 | A0A0A0MQG2_MOUSE |
| Slc12a7 Kcc4          | 1083 | 0.2227 | Q9WVL3     | S12A7_MOUSE      |
| Mrpl4 MNCb-3848       | 294  | 0.2163 | Q9DCU6     | RM04_MOUSE       |
| Dhrs7c Sdr32c2        | 311  | 0.2072 | Q8CHS7     | DRS7C_MOUSE      |
| Bves Pop1 Popdc1      | 358  | 0.2024 | Q9ES83     | POPD1_MOUSE      |
| Ndufb4                | 129  | 0.2000 | Q9CQC7     | NDUB4_MOUSE      |
| Psmd14 Pad1           | 310  | 0.1932 | Q35593     | PSDE_MOUSE       |
| Cav3                  | 151  | 0.1895 | P51637     | CAV3_MOUSE       |
| Ndufa12 mCG_11204     | 149  | 0.1892 | A0A0R4J275 | A0A0R4J275_MOUSE |
| Cyc1                  | 325  | 0.1871 | Q9D0M3     | CY1_MOUSE        |
| Mdh1 Mor2             | 334  | 0.1816 | P14152     | MDHC_MOUSE       |
| Atp5f1                | 256  | 0.1784 | Q9CQQ7     | AT5F1_MOUSE      |
| Atp1b3                | 278  | 0.1734 | P97370     | AT1B3_MOUSE      |
| Slc25a11              | 314  | 0.1488 | Q9CR62     | M2OM_MOUSE       |
| Gnai2 Gnai-2          | 355  | 0.1439 | P08752     | GNAI2_MOUSE      |
| Fbn1 Fbn-1            | 2873 | 0.1406 | Q61554     | FBN1_MOUSE       |
| Krt17 Krt1-17         | 433  | 0.1301 | Q9QWL7     | K1C17_MOUSE      |
| Cd81 Tapa1            | 236  | 0.1167 | P35762     | CD81_MOUSE       |
| Fitm2 Fit2            | 262  | 0.1163 | P59266     | FITM2_MOUSE      |
| Dag1 Dag-1            | 893  | 0.1058 | Q62165     | DAG1_MOUSE       |
| Ndufb10               | 176  | 0.1052 | Q9DCS9     | NDUBA_MOUSE      |
| Myadml2               | 307  | 0.1043 | Q08AU7     | MADL2_MOUSE      |
| Ndufb5                | 135  | 0.0946 | F6Y6V5     | F6Y6V5_MOUSE     |
| Krt42 Ka22            | 452  | 0.0738 | Q6IFX2     | K1C42_MOUSE      |
| Psmd8                 | 353  | 0.0720 | Q9CX56     | PSMD8_MOUSE      |
| Psmd1                 | 953  | 0.0716 | Q3TXS7     | PSMD1_MOUSE      |
| Wfs1                  | 814  | 0.0627 | Q3UN10     | Q3UN10_MOUSE     |
| lsd17b11 Dhrs8 Pan1b  | 298  | 0.0531 | Q9EQ06     | DHB11_MOUSE      |



|                           |      |         |          |              |
|---------------------------|------|---------|----------|--------------|
| Ndufb8                    | 186  | 0.0481  | Q9D6J5   | NDUB8_MOUSE  |
| Mrpl41                    | 135  | 0.0431  | Q9CQN7   | RM41_MOUSE   |
| Col6a3                    | 2677 | 0.0419  | J3QQ16   | J3QQ16_MOUSE |
| Col6a1                    | 1025 | 0.0183  | Q04857   | CO6A1_MOUSE  |
| Sdhc                      | 169  | 0.0140  | Q9CZB0   | C560_MOUSE   |
| Col6a2                    | 1034 | -0.0081 | Q02788   | CO6A2_MOUSE  |
| Ndufv2                    | 248  | -0.0098 | Q9D6J6   | NDUV2_MOUSE  |
| Cd36                      | 472  | -0.0130 | Q08857   | CD36_MOUSE   |
| Ndufs6 Ip13               | 116  | -0.0136 | P52503   | NDUS6_MOUSE  |
| Cox4i1 Cox4 Cox4a         | 169  | -0.0245 | P19783   | COX41_MOUSE  |
| Cltc                      | 1679 | -0.0281 | Q5SXR6   | Q5SXR6_MOUSE |
| Atp2a1                    | 994  | -0.0410 | Q8R429   | AT2A1_MOUSE  |
| Atp8a1 Atpc1              | 1164 | -0.0426 | P70704   | AT8A1_MOUSE  |
|                           | NaN  | -0.0434 | G3X9L6   | G3X9L6_MOUSE |
| Slc2a4 Glut-4 Glut4       | 509  | -0.0467 | P14142   | GTR4_MOUSE   |
| Ankh Ank                  | 492  | -0.0545 | Q9JHZ2   | ANKH_MOUSE   |
| Cyb5b Cyb5m               | 146  | -0.0606 | Q9CQX2   | CYB5B_MOUSE  |
| B2m                       | 119  | -0.0618 | P01887   | B2MG_MOUSE   |
| Fn1                       | 2361 | -0.0711 | Q3UHL6   | Q3UHL6_MOUSE |
| Ndufa10                   | 355  | -0.0711 | Q99LC3   | NDUAA_MOUSE  |
| M6pr 46mpr                | 278  | -0.0736 | P24668   | MPRD_MOUSE   |
| Cct4                      | 509  | -0.0754 | G5E839   | G5E839_MOUSE |
| Ndufs1                    | 727  | -0.0848 | Q91VD9   | NDUS1_MOUSE  |
| Slc25a12 Aralar1          | 677  | -0.0876 | Q8BH59   | CMC1_MOUSE   |
| Rdx                       | 389  | -0.1033 | Q7TSG6   | Q7TSG6_MOUSE |
| Ndufb2                    | 105  | -0.1047 | Q9CPU2   | NDUB2_MOUSE  |
| Tmem30a                   | 328  | -0.1140 | D3YVV1   | D3YVV1_MOUSE |
| Hkdc1                     | 915  | -0.1441 | Q91W97   | HKDC1_MOUSE  |
| Msn                       | 577  | -0.1451 | P26041   | MOES_MOUSE   |
| Ndufa8                    | 172  | -0.1506 | Q9DCJ5   | NDUA8_MOUSE  |
| Yif1b                     | 251  | -0.1514 | D3YY42   | D3YY42_MOUSE |
| Ace Dcp1                  | 1312 | -0.1657 | P09470   | ACE_MOUSE    |
| Ncstn                     | 708  | -0.1674 | P57716   | NICA_MOUSE   |
| Tmem43                    | 400  | -0.1814 | Q9DBS1   | TMM43_MOUSE  |
| Mrpl3 mCG_14748           | 304  | -0.1932 | D3Z456   | D3Z456_MOUSE |
| Ndrp2 Kiaa1248 Ndr2       | 371  | -0.2066 | Q9QYG0   | NDRG2_MOUSE  |
| Ndufs5                    | 91   | -0.2105 | B1ARW4   | B1ARW4_MOUSE |
| Mrpl2                     | 304  | -0.2132 | B1B1D8   | B1B1D8_MOUSE |
| Acat1                     | 424  | -0.2287 | Q8QZT1   | THIL_MOUSE   |
| Myom2                     | 1463 | -0.2288 | Q14BI5   | Q14BI5_MOUSE |
| Pxmp2 mCG_134215          | 193  | -0.2389 | Q5D073   | Q5D073_MOUSE |
| Slc44a1                   | 656  | -0.2408 | A2AMH5   | A2AMH5_MOUSE |
| Selenbp2                  | 134  | -0.2467 | G3UZZ2   | G3UZZ2_MOUSE |
| Nt5c2                     | 586  | -0.2480 | E9Q9M1   | E9Q9M1_MOUSE |
| Cox5b mCG_17741 mCG_23026 | 129  | -0.3013 | Q9D881   | Q9D881_MOUSE |
| Syngr1                    | 234  | -0.3132 | O55100   | SNG1_MOUSE   |
| Anxa5 Anx5                | 319  | -0.3230 | P48036   | ANXA5_MOUSE  |
| Atp2a2                    | 1044 | -0.3400 | O55143-2 | AT2A2_MOUSE  |
| Myh7                      | 1935 | -0.3455 | Q91Z83   | MYH7_MOUSE   |
| Slc12a4                   | 1087 | -0.3455 | F8WIJ0   | F8WIJ0_MOUSE |

|                         |      |         |            |                  |
|-------------------------|------|---------|------------|------------------|
| Gnb1                    | 273  | -0.3519 | H3BKR2     | H3BKR2_MOUSE     |
| Actg1 Actg              | 375  | -0.3531 | P63260     | ACTG_MOUSE       |
| Vtstp8 Atp8 mt-Atp8     | 67   | -0.3594 | P03930     | ATP8_MOUSE       |
| Lamp2 Lamp-2            | 415  | -0.3640 | P17047     | LAMP2_MOUSE      |
| Uqcrc1                  | 480  | -0.3713 | Q9CZ13     | QCR1_MOUSE       |
| Mrpl37                  | 423  | -0.3745 | Q921S7     | RM37_MOUSE       |
| Smpd2                   | 419  | -0.3746 | O70572     | NSMA_MOUSE       |
| Anxa6                   | 667  | -0.3814 | F8WIT2     | F8WIT2_MOUSE     |
| Rap1a mCG_10748         | 118  | -0.3847 | A0A0G2JDL9 | A0A0G2JDL9_MOUSE |
| Cavin4 Murc             | 362  | -0.3998 | A2AMM0     | CAVN4_MOUSE      |
| Tmx1                    | 124  | -0.4453 | F6V084     | F6V084_MOUSE     |
| d2 Cdgh2 Noxp70 Zcd2    | 135  | -0.4520 | Q9CQB5     | CISD2_MOUSE      |
| Rpl19                   | 194  | -0.4779 | A2A547     | A2A547_MOUSE     |
| Bsg                     | 197  | -0.4949 | J3QP71     | J3QP71_MOUSE     |
| Cds2                    | 194  | -0.5383 | F6S4G2     | F6S4G2_MOUSE     |
| Sspn mCG_15024          | 216  | -0.5386 | Q3TRE0     | Q3TRE0_MOUSE     |
| Lpgat1                  | 409  | -0.5590 | E9QL80     | E9QL80_MOUSE     |
| Anxa2                   | 176  | -0.5837 | B0V2N8     | B0V2N8_MOUSE     |
| at3 Grcc3f Mboat5 Oact5 | 487  | -0.6015 | Q91V01     | MBOA5_MOUSE      |
| Ap2m1 mCG_128452        | 433  | -0.6270 | Q3TWV4     | Q3TWV4_MOUSE     |
| Mrpl27                  | 148  | -0.6336 | Q99N92     | RM27_MOUSE       |
| Uqcrq                   | 82   | -0.7405 | Q9CQ69     | QCR8_MOUSE       |
| Rps21                   | 83   | -0.8363 | Q9CQR2     | RS21_MOUSE       |
| Slc29a1                 | 358  | -0.8484 | E9PXM6     | E9PXM6_MOUSE     |
| Cdipt                   | 185  | -0.9632 | A0A0U1RP13 | A0A0U1RP13_MOUSE |
| Tmem14c                 | 114  | -1.1246 | Q9CQN6     | TM14C_MOUSE      |
| Glg1                    | 1163 | -1.2077 | F8WHM5     | F8WHM5_MOUSE     |
| Cpne3 Kiaa0636          | 533  | -1.2567 | Q8BT60     | CPNE3_MOUSE      |
| Tmem205                 | 173  | -1.3642 | A0A1L1SSA8 | A0A1L1SSA8_MOUSE |

## Supplementary Data 2

ExoCarta TOP proteins

Gene Symbol

ACTG1

AHCY

ALB

ALDOA

ANXA11

ANXA2

ANXA4

ANXA5

ANXA6

ATP1A1

BSG

CCT2

CCT3

CD81

CLTC

ENO1

GNAI2

GNB1

GNB2

HSP90AB1

HSPA5

HSPA8

ITGB1

LAMP2

LDHA

LDHB

MSN

MVP

MYH9

PGK1

PKM

PRDX1

PRDX2

PTGFRN

RAB1A

RAC1

SLC16A1

STOM

TCP1

TFRC

TPI1

TUBA1C

VCP

YWHAE

YWHAZ

YWHAG

A2M

TUBA1B  
RAC1  
LGALS3BP  
HSPA1A  
GNAI2  
ANXA1  
RHOA  
MFGE8  
PRDX2  
GDI2  
EHD4  
ACTN4  
YWHAB  
RAB7A  
LDHB  
GNAS  
RAB5C  
ARF1  
ANXA6  
ANXA11  
ACTG1  
KPNB1  
EZR  
ANXA4  
ACLY  
TUBA1C  
TFRC  
RAB14  
HIST2H4A  
GNB1  
THBS1  
RAN  
RAB5A  
PTGFRN  
CCT5  
CCT3  
AHCY  
UBA1  
RAB5B  
RAB1A  
LAMP2  
ITGA6  
HIST1H4B  
BSG  
YWHAH  
TUBA1A  
TKT  
TCP1  
STOM  
SLC16A1

RAB8A  
MYH9  
MVP

### Supplementary Data 3

#### Antibody list

| Name                                                                      | Manufacturer                 | Species | Dilution                  |
|---------------------------------------------------------------------------|------------------------------|---------|---------------------------|
| anti-CRYAB                                                                | abcam                        | mouse   | 1:1000 (WB)/<br>1:100 IF  |
| anti-GAPDH                                                                | Proteintech                  | mouse   | 1:50000 (WB)              |
| anti-CD81                                                                 | abcam                        | rabbit  | 1:1000 (WB)               |
| anti-TSG101                                                               | abcam                        | rabbit  | 1:1000 (WB)               |
| anti-GM130                                                                | abcam                        | rabbit  | 1:1000 (WB)               |
| anti-KI67                                                                 | abcam                        | rabbit  | 1:200 (IF)                |
| Anti-LAMP1                                                                | Sigma Aldrich                | rabbit  | 1:200 (IF)                |
| Anti-CTNNB1                                                               | BD Transduction              | mouse   | 1:200 (IF)                |
| Anti-TUBA1B                                                               | Proteintech                  | mouse   | 1:200 (IF)                |
| Anti-GAPDH                                                                | Cell signaling<br>technology | mouse   | 1:1000 (WB)               |
| Anti-Calnexin                                                             | abcam                        | rabbit  | 1:1000 (WB)               |
| Anti-Vinculin                                                             | Cell signaling<br>technology | rabbit  | 1:1000 (WB)               |
| Anti-Ubiquitin (P4D1)                                                     | Cell signaling<br>technology | mouse   | 1:1000                    |
| Phospho- $\beta$ -Catenin<br>(Ser675)                                     | Cell signaling<br>technology | rabbit  | 1:200<br>(IF)/1:1000 (WB) |
| Non-phospho (Active) $\beta$ -<br>Catenin<br>(Ser33/37/Thr41)<br>Antibody | Cell signaling<br>technology | rabbit  | 1:1000 (WB)               |
| Anti-rabbit IgG, HRP-<br>linked Antibody                                  | Cell signaling<br>technology | rabbit  | 1:10000 (WB)              |
| Anti-mouse IgG, HRP-<br>linked Antibody                                   | Cell signaling<br>technology | mouse   | 1:10000 (WB)              |
