# Supplementary material for: Single-cell transcriptomics reveal extracellular vesicles secretion with a cardiomyocyte proteostasis signature during pathological remodeling
Source: Springer Nature journal article supplement (doi:10.1038/s42003-022-04402-9), 2023-01-21
Supplement: MOESM5 [file 42003_2022_4402_MOESM5_ESM.pdf › 42003_2022_4402_MOESM5_ESM.pdf]

Reporting Summary

Nature Portfolio wishes to improve the reproducibility of the work that we publish. This form provides structure for consistency and transparency in reporting. For further information on Nature Portfolio policies, see our [Editorial Policies](#) and the [Editorial Policy Checklist](#).

Statistics

For all statistical analyses, confirm that the following items are present in the figure legend, table legend, main text, or Methods section.

|                                     |                                                                                                                                                                                                                                                                                                |
|-------------------------------------|------------------------------------------------------------------------------------------------------------------------------------------------------------------------------------------------------------------------------------------------------------------------------------------------|
| n/a                                 | Confirmed                                                                                                                                                                                                                                                                                      |
| <input type="checkbox"/>            | <input checked="" type="checkbox"/> The exact sample size ( <i>n</i> ) for each experimental group/condition, given as a discrete number and unit of measurement                                                                                                                               |
| <input type="checkbox"/>            | <input checked="" type="checkbox"/> A statement on whether measurements were taken from distinct samples or whether the same sample was measured repeatedly                                                                                                                                    |
| <input type="checkbox"/>            | <input checked="" type="checkbox"/> The statistical test(s) used AND whether they are one- or two-sided<br><i>Only common tests should be described solely by name; describe more complex techniques in the Methods section.</i>                                                               |
| <input checked="" type="checkbox"/> | <input type="checkbox"/> A description of all covariates tested                                                                                                                                                                                                                                |
| <input checked="" type="checkbox"/> | <input type="checkbox"/> A description of any assumptions or corrections, such as tests of normality and adjustment for multiple comparisons                                                                                                                                                   |
| <input type="checkbox"/>            | <input checked="" type="checkbox"/> A full description of the statistical parameters including central tendency (e.g. means) or other basic estimates (e.g. regression coefficient) AND variation (e.g. standard deviation) or associated estimates of uncertainty (e.g. confidence intervals) |
| <input type="checkbox"/>            | <input checked="" type="checkbox"/> For null hypothesis testing, the test statistic (e.g. <i>F</i> , <i>t</i> , <i>r</i> ) with confidence intervals, effect sizes, degrees of freedom and <i>P</i> value noted<br><i>Give P values as exact values whenever suitable.</i>                     |
| <input checked="" type="checkbox"/> | <input type="checkbox"/> For Bayesian analysis, information on the choice of priors and Markov chain Monte Carlo settings                                                                                                                                                                      |
| <input checked="" type="checkbox"/> | <input type="checkbox"/> For hierarchical and complex designs, identification of the appropriate level for tests and full reporting of outcomes                                                                                                                                                |
| <input type="checkbox"/>            | <input checked="" type="checkbox"/> Estimates of effect sizes (e.g. Cohen's <i>d</i> , Pearson's <i>r</i> ), indicating how they were calculated                                                                                                                                               |

Our web collection on [statistics for biologists](#) contains articles on many of the points above.

Software and code

Policy information about [availability of computer code](#)

|                 |                                                                                                                                                                                                                                                                                                                                                                                                                                                                                                                                                                                                                                                                                                                                                                                                                                                                                                                                                                                                                                                                                                                                                                                                                                                                                                                                                                                                                                                                                                                                                                                                                                                                                                                                                                                                                                                                                                                                                                                                                                                                                   |
|-----------------|-----------------------------------------------------------------------------------------------------------------------------------------------------------------------------------------------------------------------------------------------------------------------------------------------------------------------------------------------------------------------------------------------------------------------------------------------------------------------------------------------------------------------------------------------------------------------------------------------------------------------------------------------------------------------------------------------------------------------------------------------------------------------------------------------------------------------------------------------------------------------------------------------------------------------------------------------------------------------------------------------------------------------------------------------------------------------------------------------------------------------------------------------------------------------------------------------------------------------------------------------------------------------------------------------------------------------------------------------------------------------------------------------------------------------------------------------------------------------------------------------------------------------------------------------------------------------------------------------------------------------------------------------------------------------------------------------------------------------------------------------------------------------------------------------------------------------------------------------------------------------------------------------------------------------------------------------------------------------------------------------------------------------------------------------------------------------------------|
| Data collection | For proteomics, protein identification was achieved using ProteinPilot Software version 5.0 build 4769 (AB Sciex) at “thorough” settings. The combined qualitative analyses were searched against the UniProtKB mouse reference proteome (revision 12-2017, 60717 entries) augmented with a set of 52 known common laboratory contaminants to identify proteins at a False Discovery Rate (FDR) of 1%.<br>For single cell library preparation, heart cells were singularized and were distributed on 5,184 nanowell chips ICELL8 250v Chip (ICELL8 System, Takara Bio).                                                                                                                                                                                                                                                                                                                                                                                                                                                                                                                                                                                                                                                                                                                                                                                                                                                                                                                                                                                                                                                                                                                                                                                                                                                                                                                                                                                                                                                                                                           |
| Data analysis   | For proteomics, spectral library generation and SWATH peak extraction were achieved in PeakView Software version 2.1 build 11041 (AB Sciex) using the SWATH quantitation microApp version 2.0 build 2003. Following retention time correction using the iRT standard, peak areas were extracted using information from the MS/MS library at an FDR of 1%76. The resulting peak areas were then summed to peptide and finally protein area values per injection, which were used for further statistical analysis in Perseus 1.5.6.0 software (Max Planck Institute for Biochemistry, Martinsried, Germany). STRING (Search Tool for the Retrieval of Interacting Genes/Proteins) ( <a href="http://string-db.org/">http://string-db.org/</a> ) was used for network analysis.<br>Raw sequencing files (bcl-files) were converted into a single fastq file using Illumina bcl2fastq software (v2.20.0.422) for each platform. Each fastq file was demultiplexed and analysed using the Cogent NGS analysis pipeline (CogentAP) from Takara Bio (v1.0). In brief, cogent demux wrapper function was used to allocate the reads to the cells based on the cell barcodes provided in the well-list files. Subsequently, cogent analyze wrapper function performed read trimming with cutadapt(Martin 2011)(version 3.2), genome alignment to Mus musculus genome GRCh38 using STAR(Dobin, Davis et al. 2013) (version 2.7.7a), read counting for exonic, genomic and mitochondrial regions using featureCounts(Liao, Smyth et al. 2013) (version 2.0.1) and utilizing Mus musculus gene annotation version 102 from ENSEMBL and generating a gene matrix with number of reads expressed for each cell in each gene. Raw gene matrices underwent quality control (QC) filtering for cells and genes using the following parameters: (a) for cells, only those with at least 2500 genes and less than 30 % of mitochondrial reads, and (b) for genes, only those containing at least 100 reads mapped to them from at least 3 different cells. The bioinformatic analysis was performed |

using the Seurat package (version 4.1.2)(Hao, Hao et al. 2021). Expression matrices were split by Chip and, after normalization by 'NormalizeData' using default settings and selection of the 2000 most variable features using 'FidVariableFeatures'. Integration of the datasets was performed by the standard parameters of 'IntegrateData'. Data was scaled and centered by 'ScaleData', regressing out the variability caused by the mitochondrial percentage and the Depth of the sequencing. Dimensions were reduced using 'RunPCA'. Afterwards, 'FindNeighbors' (dimension parameter = 1:9) and 'FindClusters' (granularity parameter = 0.3) were run and the clusters were visualized, after UMAP reduction was calculated by using Louvian algorithm. Gene ontology (GO) analyses were performed using default parameters and stringency in 'ClueGO' (Cytoscape)(Bindea, Mlecnik et al. 2009) and DAVIS. The significant gene ontologies (GO) are shown with  $p < 0.05$ . The cardiomyocyte stress, hypoxia and EV scores were calculated by the expression of established markers per cell(Nicin, Schroeter et al. 2022). Ggplot2(Wickham 2016), Dplyr(Wickham H 2022) and EnhancedVolcano packages were used for data visualization(Blighe 2018).

For manuscripts utilizing custom algorithms or software that are central to the research but not yet described in published literature, software must be made available to editors and reviewers. We strongly encourage code deposition in a community repository (e.g. GitHub). See the Nature Portfolio [guidelines for submitting code & software](#) for further information.

## Data

Policy information about [availability of data](#)

All manuscripts must include a [data availability statement](#). This statement should provide the following information, where applicable:

- Accession codes, unique identifiers, or web links for publicly available datasets
- A description of any restrictions on data availability
- For clinical datasets or third party data, please ensure that the statement adheres to our [policy](#)

The mass spectrometry proteomic dataset generated during the current study is available in the ProteomeXchange Consortium via the PRIDE(Perez-Riverol, Csordas et al. 2018) partner repository with the dataset identifier PXD031113, the bulk RNAseq data is available at NCBI GEO under accession GSE97763, the raw and normalized Single Cell RNAseq data is available at <https://owncloud.-gwdg.de/index.php/s/NeSJGuf2o2yc2qn>. Reporting of the EV protocol is available at [evtrack.org](https://evtrack.org) (IDEV220418) (Van Deun, Mestdagh et al. 2017) including the MISEV2018(Théry, Witwer et al. 2018). The uncropped Western blots in Supplementary Figure 10.

## Human research participants

Policy information about [studies involving human research participants and Sex and Gender in Research](#).

Reporting on sex and gender

na

Population characteristics

na

Recruitment

na

Ethics oversight

na

Note that full information on the approval of the study protocol must also be provided in the manuscript.

## Field-specific reporting

Please select the one below that is the best fit for your research. If you are not sure, read the appropriate sections before making your selection.

☒ Life sciences ☐ Behavioural & social sciences ☐ Ecological, evolutionary & environmental sciences

For a reference copy of the document with all sections, see [nature.com/documents/nr-reporting-summary-flat.pdf](https://nature.com/documents/nr-reporting-summary-flat.pdf)

## Life sciences study design

All studies must disclose these points even when the disclosure is negative.

Sample size

For single cell analysis, a priori: Compute required sample size, was used. Sample size per group=105 (Effect size  $d=0.5$ , power  $(1-\beta \text{ err prob})=0.95$ , comparison two independent groups). For mice interventions (TAC), sample size per group=3 (Effect size  $d=0.9$ , power  $(1-\beta \text{ err prob})=0.85$ , comparison two independent groups).

Data exclusions

na

Replication

Biological replicates were used for SCS. Biological and technical replicates were used for proteomics and in vitro studies.

Randomization

na

Blinding

Investigators were blinded for proteomics, transcriptomics, functional and Western blot experiments.

# Behavioural & social sciences study design

All studies must disclose on these points even when the disclosure is negative.

|                   |                                                                                                                                                                                                                                                                                                                                                                                                                                                                                 |
|-------------------|---------------------------------------------------------------------------------------------------------------------------------------------------------------------------------------------------------------------------------------------------------------------------------------------------------------------------------------------------------------------------------------------------------------------------------------------------------------------------------|
| Study description | Briefly describe the study type including whether data are quantitative, qualitative, or mixed-methods (e.g. qualitative cross-sectional, quantitative experimental, mixed-methods case study).                                                                                                                                                                                                                                                                                 |
| Research sample   | State the research sample (e.g. Harvard university undergraduates, villagers in rural India) and provide relevant demographic information (e.g. age, sex) and indicate whether the sample is representative. Provide a rationale for the study sample chosen. For studies involving existing datasets, please describe the dataset and source.                                                                                                                                  |
| Sampling strategy | Describe the sampling procedure (e.g. random, snowball, stratified, convenience). Describe the statistical methods that were used to predetermine sample size OR if no sample-size calculation was performed, describe how sample sizes were chosen and provide a rationale for why these sample sizes are sufficient. For qualitative data, please indicate whether data saturation was considered, and what criteria were used to decide that no further sampling was needed. |
| Data collection   | Provide details about the data collection procedure, including the instruments or devices used to record the data (e.g. pen and paper, computer, eye tracker, video or audio equipment) whether anyone was present besides the participant(s) and the researcher, and whether the researcher was blind to experimental condition and/or the study hypothesis during data collection.                                                                                            |
| Timing            | Indicate the start and stop dates of data collection. If there is a gap between collection periods, state the dates for each sample cohort.                                                                                                                                                                                                                                                                                                                                     |
| Data exclusions   | If no data were excluded from the analyses, state so OR if data were excluded, provide the exact number of exclusions and the rationale behind them, indicating whether exclusion criteria were pre-established.                                                                                                                                                                                                                                                                |
| Non-participation | State how many participants dropped out/declined participation and the reason(s) given OR provide response rate OR state that no participants dropped out/declined participation.                                                                                                                                                                                                                                                                                               |
| Randomization     | If participants were not allocated into experimental groups, state so OR describe how participants were allocated to groups, and if allocation was not random, describe how covariates were controlled.                                                                                                                                                                                                                                                                         |

# Ecological, evolutionary & environmental sciences study design

All studies must disclose on these points even when the disclosure is negative.

|                          |                                                                                                                                                                                                                                                                                                                                                                                                                                                         |
|--------------------------|---------------------------------------------------------------------------------------------------------------------------------------------------------------------------------------------------------------------------------------------------------------------------------------------------------------------------------------------------------------------------------------------------------------------------------------------------------|
| Study description        | Briefly describe the study. For quantitative data include treatment factors and interactions, design structure (e.g. factorial, nested, hierarchical), nature and number of experimental units and replicates.                                                                                                                                                                                                                                          |
| Research sample          | Describe the research sample (e.g. a group of tagged <i>Passer domesticus</i> , all <i>Stenocereus thurberi</i> within Organ Pipe Cactus National Monument), and provide a rationale for the sample choice. When relevant, describe the organism taxa, source, sex, age range and any manipulations. State what population the sample is meant to represent when applicable. For studies involving existing datasets, describe the data and its source. |
| Sampling strategy        | Note the sampling procedure. Describe the statistical methods that were used to predetermine sample size OR if no sample-size calculation was performed, describe how sample sizes were chosen and provide a rationale for why these sample sizes are sufficient.                                                                                                                                                                                       |
| Data collection          | Describe the data collection procedure, including who recorded the data and how.                                                                                                                                                                                                                                                                                                                                                                        |
| Timing and spatial scale | Indicate the start and stop dates of data collection, noting the frequency and periodicity of sampling and providing a rationale for these choices. If there is a gap between collection periods, state the dates for each sample cohort. Specify the spatial scale from which the data are taken                                                                                                                                                       |
| Data exclusions          | If no data were excluded from the analyses, state so OR if data were excluded, describe the exclusions and the rationale behind them, indicating whether exclusion criteria were pre-established.                                                                                                                                                                                                                                                       |
| Reproducibility          | Describe the measures taken to verify the reproducibility of experimental findings. For each experiment, note whether any attempts to repeat the experiment failed OR state that all attempts to repeat the experiment were successful.                                                                                                                                                                                                                 |
| Randomization            | Describe how samples/organisms/participants were allocated into groups. If allocation was not random, describe how covariates were controlled. If this is not relevant to your study, explain why.                                                                                                                                                                                                                                                      |
| Blinding                 | Describe the extent of blinding used during data acquisition and analysis. If blinding was not possible, describe why OR explain why blinding was not relevant to your study.                                                                                                                                                                                                                                                                           |

Did the study involve field work? ☐ Yes ☐ No

## Field work, collection and transport

|                        |                                                                                                                                                                                                                                                                                                                                       |
|------------------------|---------------------------------------------------------------------------------------------------------------------------------------------------------------------------------------------------------------------------------------------------------------------------------------------------------------------------------------|
| Field conditions       | <i>Describe the study conditions for field work, providing relevant parameters (e.g. temperature, rainfall).</i>                                                                                                                                                                                                                      |
| Location               | <i>State the location of the sampling or experiment, providing relevant parameters (e.g. latitude and longitude, elevation, water depth).</i>                                                                                                                                                                                         |
| Access & import/export | <i>Describe the efforts you have made to access habitats and to collect and import/export your samples in a responsible manner and in compliance with local, national and international laws, noting any permits that were obtained (give the name of the issuing authority, the date of issue, and any identifying information).</i> |
| Disturbance            | <i>Describe any disturbance caused by the study and how it was minimized.</i>                                                                                                                                                                                                                                                         |

## Reporting for specific materials, systems and methods

We require information from authors about some types of materials, experimental systems and methods used in many studies. Here, indicate whether each material, system or method listed is relevant to your study. If you are not sure if a list item applies to your research, read the appropriate section before selecting a response.

### Materials & experimental systems

|                          |                                                                 |
|--------------------------|-----------------------------------------------------------------|
| n/a                      | Involved in the study                                           |
| <input type="checkbox"/> | <input checked="" type="checkbox"/> Antibodies                  |
| <input type="checkbox"/> | <input checked="" type="checkbox"/> Eukaryotic cell lines       |
| <input type="checkbox"/> | <input type="checkbox"/> Palaeontology and archaeology          |
| <input type="checkbox"/> | <input checked="" type="checkbox"/> Animals and other organisms |
| <input type="checkbox"/> | <input type="checkbox"/> Clinical data                          |
| <input type="checkbox"/> | <input type="checkbox"/> Dual use research of concern           |

### Methods

|                          |                                                 |
|--------------------------|-------------------------------------------------|
| n/a                      | Involved in the study                           |
| <input type="checkbox"/> | <input type="checkbox"/> ChIP-seq               |
| <input type="checkbox"/> | <input type="checkbox"/> Flow cytometry         |
| <input type="checkbox"/> | <input type="checkbox"/> MRI-based neuroimaging |

## Antibodies

| Antibodies used                                          | <table> <thead> <tr> <th>Name</th> <th>Manufacturer</th> <th>Species</th> <th>Dilution</th> </tr> </thead> <tbody> <tr> <td>anti-CRYAB</td> <td>abcam</td> <td>mouse</td> <td>1:1000 (WB)/ 1:100 IF</td> </tr> <tr> <td>anti-GAPDH</td> <td>Proteintech</td> <td>mouse</td> <td>1:50000 (WB)</td> </tr> <tr> <td>anti-CD81</td> <td>abcam</td> <td>rabbit</td> <td>1:1000 (WB)</td> </tr> <tr> <td>anti-TSG101</td> <td>abcam</td> <td>rabbit</td> <td>1:1000 (WB)</td> </tr> <tr> <td>anti-GM130</td> <td>abcam</td> <td>rabbit</td> <td>1:1000 (WB)</td> </tr> <tr> <td>anti-KI67</td> <td>abcam</td> <td>rabbit</td> <td>1:200 (IF)</td> </tr> <tr> <td>Anti-LAMP1</td> <td>Sigma Aldrich</td> <td>rabbit</td> <td>1:200 (IF)</td> </tr> <tr> <td>Anti-CTNNB1</td> <td>BD Transduction</td> <td>mouse</td> <td>1:200 (IF)</td> </tr> <tr> <td>Anti-TUBA1B</td> <td>Proteintech</td> <td>mouse</td> <td>1:200 (IF)</td> </tr> <tr> <td>Anti-GAPDH</td> <td>Cell signaling technology</td> <td>mouse</td> <td>1:1000 (WB)</td> </tr> <tr> <td>Anti-Calnexin</td> <td>abcam</td> <td>rabbit</td> <td>1:1000 (WB)</td> </tr> <tr> <td>Anti-Vinculin</td> <td>Cell signaling technology</td> <td>rabbit</td> <td>1:1000 (WB)</td> </tr> <tr> <td>Anti-Ubiquitin (P4D1)</td> <td>Cell signaling technology</td> <td>mouse</td> <td>1:1000</td> </tr> <tr> <td>Phospho-β-Catenin (Ser675)</td> <td>Cell signaling technology</td> <td>rabbit</td> <td>1:200 (IF)</td> </tr> <tr> <td>Non-phospho (Active) β-Catenin (Ser33/37/Thr41) Antibody</td> <td>Cell signaling technology</td> <td>rabbit</td> <td>1:1000 (WB)</td> </tr> <tr> <td>Anti-rabbit IgG, HRP-linked Antibody</td> <td>Cell signaling technology</td> <td>rabbit</td> <td>1:10000 (WB)</td> </tr> <tr> <td>Anti-mouse IgG, HRP-linked Antibody</td> <td>Cell signaling technology</td> <td>mouse</td> <td>1:10000 (WB)</td> </tr> </tbody> </table> | Name    | Manufacturer          | Species | Dilution | anti-CRYAB | abcam | mouse | 1:1000 (WB)/ 1:100 IF | anti-GAPDH | Proteintech | mouse | 1:50000 (WB) | anti-CD81 | abcam | rabbit | 1:1000 (WB) | anti-TSG101 | abcam | rabbit | 1:1000 (WB) | anti-GM130 | abcam | rabbit | 1:1000 (WB) | anti-KI67 | abcam | rabbit | 1:200 (IF) | Anti-LAMP1 | Sigma Aldrich | rabbit | 1:200 (IF) | Anti-CTNNB1 | BD Transduction | mouse | 1:200 (IF) | Anti-TUBA1B | Proteintech | mouse | 1:200 (IF) | Anti-GAPDH | Cell signaling technology | mouse | 1:1000 (WB) | Anti-Calnexin | abcam | rabbit | 1:1000 (WB) | Anti-Vinculin | Cell signaling technology | rabbit | 1:1000 (WB) | Anti-Ubiquitin (P4D1) | Cell signaling technology | mouse | 1:1000 | Phospho-β-Catenin (Ser675) | Cell signaling technology | rabbit | 1:200 (IF) | Non-phospho (Active) β-Catenin (Ser33/37/Thr41) Antibody | Cell signaling technology | rabbit | 1:1000 (WB) | Anti-rabbit IgG, HRP-linked Antibody | Cell signaling technology | rabbit | 1:10000 (WB) | Anti-mouse IgG, HRP-linked Antibody | Cell signaling technology | mouse | 1:10000 (WB) |
|----------------------------------------------------------|------------------------------------------------------------------------------------------------------------------------------------------------------------------------------------------------------------------------------------------------------------------------------------------------------------------------------------------------------------------------------------------------------------------------------------------------------------------------------------------------------------------------------------------------------------------------------------------------------------------------------------------------------------------------------------------------------------------------------------------------------------------------------------------------------------------------------------------------------------------------------------------------------------------------------------------------------------------------------------------------------------------------------------------------------------------------------------------------------------------------------------------------------------------------------------------------------------------------------------------------------------------------------------------------------------------------------------------------------------------------------------------------------------------------------------------------------------------------------------------------------------------------------------------------------------------------------------------------------------------------------------------------------------------------------------------------------------------------------------------------------------------------------------------------------------------------------------------------------------------------------------------------------------------|---------|-----------------------|---------|----------|------------|-------|-------|-----------------------|------------|-------------|-------|--------------|-----------|-------|--------|-------------|-------------|-------|--------|-------------|------------|-------|--------|-------------|-----------|-------|--------|------------|------------|---------------|--------|------------|-------------|-----------------|-------|------------|-------------|-------------|-------|------------|------------|---------------------------|-------|-------------|---------------|-------|--------|-------------|---------------|---------------------------|--------|-------------|-----------------------|---------------------------|-------|--------|----------------------------|---------------------------|--------|------------|----------------------------------------------------------|---------------------------|--------|-------------|--------------------------------------|---------------------------|--------|--------------|-------------------------------------|---------------------------|-------|--------------|
| Name                                                     | Manufacturer                                                                                                                                                                                                                                                                                                                                                                                                                                                                                                                                                                                                                                                                                                                                                                                                                                                                                                                                                                                                                                                                                                                                                                                                                                                                                                                                                                                                                                                                                                                                                                                                                                                                                                                                                                                                                                                                                                     | Species | Dilution              |         |          |            |       |       |                       |            |             |       |              |           |       |        |             |             |       |        |             |            |       |        |             |           |       |        |            |            |               |        |            |             |                 |       |            |             |             |       |            |            |                           |       |             |               |       |        |             |               |                           |        |             |                       |                           |       |        |                            |                           |        |            |                                                          |                           |        |             |                                      |                           |        |              |                                     |                           |       |              |
| anti-CRYAB                                               | abcam                                                                                                                                                                                                                                                                                                                                                                                                                                                                                                                                                                                                                                                                                                                                                                                                                                                                                                                                                                                                                                                                                                                                                                                                                                                                                                                                                                                                                                                                                                                                                                                                                                                                                                                                                                                                                                                                                                            | mouse   | 1:1000 (WB)/ 1:100 IF |         |          |            |       |       |                       |            |             |       |              |           |       |        |             |             |       |        |             |            |       |        |             |           |       |        |            |            |               |        |            |             |                 |       |            |             |             |       |            |            |                           |       |             |               |       |        |             |               |                           |        |             |                       |                           |       |        |                            |                           |        |            |                                                          |                           |        |             |                                      |                           |        |              |                                     |                           |       |              |
| anti-GAPDH                                               | Proteintech                                                                                                                                                                                                                                                                                                                                                                                                                                                                                                                                                                                                                                                                                                                                                                                                                                                                                                                                                                                                                                                                                                                                                                                                                                                                                                                                                                                                                                                                                                                                                                                                                                                                                                                                                                                                                                                                                                      | mouse   | 1:50000 (WB)          |         |          |            |       |       |                       |            |             |       |              |           |       |        |             |             |       |        |             |            |       |        |             |           |       |        |            |            |               |        |            |             |                 |       |            |             |             |       |            |            |                           |       |             |               |       |        |             |               |                           |        |             |                       |                           |       |        |                            |                           |        |            |                                                          |                           |        |             |                                      |                           |        |              |                                     |                           |       |              |
| anti-CD81                                                | abcam                                                                                                                                                                                                                                                                                                                                                                                                                                                                                                                                                                                                                                                                                                                                                                                                                                                                                                                                                                                                                                                                                                                                                                                                                                                                                                                                                                                                                                                                                                                                                                                                                                                                                                                                                                                                                                                                                                            | rabbit  | 1:1000 (WB)           |         |          |            |       |       |                       |            |             |       |              |           |       |        |             |             |       |        |             |            |       |        |             |           |       |        |            |            |               |        |            |             |                 |       |            |             |             |       |            |            |                           |       |             |               |       |        |             |               |                           |        |             |                       |                           |       |        |                            |                           |        |            |                                                          |                           |        |             |                                      |                           |        |              |                                     |                           |       |              |
| anti-TSG101                                              | abcam                                                                                                                                                                                                                                                                                                                                                                                                                                                                                                                                                                                                                                                                                                                                                                                                                                                                                                                                                                                                                                                                                                                                                                                                                                                                                                                                                                                                                                                                                                                                                                                                                                                                                                                                                                                                                                                                                                            | rabbit  | 1:1000 (WB)           |         |          |            |       |       |                       |            |             |       |              |           |       |        |             |             |       |        |             |            |       |        |             |           |       |        |            |            |               |        |            |             |                 |       |            |             |             |       |            |            |                           |       |             |               |       |        |             |               |                           |        |             |                       |                           |       |        |                            |                           |        |            |                                                          |                           |        |             |                                      |                           |        |              |                                     |                           |       |              |
| anti-GM130                                               | abcam                                                                                                                                                                                                                                                                                                                                                                                                                                                                                                                                                                                                                                                                                                                                                                                                                                                                                                                                                                                                                                                                                                                                                                                                                                                                                                                                                                                                                                                                                                                                                                                                                                                                                                                                                                                                                                                                                                            | rabbit  | 1:1000 (WB)           |         |          |            |       |       |                       |            |             |       |              |           |       |        |             |             |       |        |             |            |       |        |             |           |       |        |            |            |               |        |            |             |                 |       |            |             |             |       |            |            |                           |       |             |               |       |        |             |               |                           |        |             |                       |                           |       |        |                            |                           |        |            |                                                          |                           |        |             |                                      |                           |        |              |                                     |                           |       |              |
| anti-KI67                                                | abcam                                                                                                                                                                                                                                                                                                                                                                                                                                                                                                                                                                                                                                                                                                                                                                                                                                                                                                                                                                                                                                                                                                                                                                                                                                                                                                                                                                                                                                                                                                                                                                                                                                                                                                                                                                                                                                                                                                            | rabbit  | 1:200 (IF)            |         |          |            |       |       |                       |            |             |       |              |           |       |        |             |             |       |        |             |            |       |        |             |           |       |        |            |            |               |        |            |             |                 |       |            |             |             |       |            |            |                           |       |             |               |       |        |             |               |                           |        |             |                       |                           |       |        |                            |                           |        |            |                                                          |                           |        |             |                                      |                           |        |              |                                     |                           |       |              |
| Anti-LAMP1                                               | Sigma Aldrich                                                                                                                                                                                                                                                                                                                                                                                                                                                                                                                                                                                                                                                                                                                                                                                                                                                                                                                                                                                                                                                                                                                                                                                                                                                                                                                                                                                                                                                                                                                                                                                                                                                                                                                                                                                                                                                                                                    | rabbit  | 1:200 (IF)            |         |          |            |       |       |                       |            |             |       |              |           |       |        |             |             |       |        |             |            |       |        |             |           |       |        |            |            |               |        |            |             |                 |       |            |             |             |       |            |            |                           |       |             |               |       |        |             |               |                           |        |             |                       |                           |       |        |                            |                           |        |            |                                                          |                           |        |             |                                      |                           |        |              |                                     |                           |       |              |
| Anti-CTNNB1                                              | BD Transduction                                                                                                                                                                                                                                                                                                                                                                                                                                                                                                                                                                                                                                                                                                                                                                                                                                                                                                                                                                                                                                                                                                                                                                                                                                                                                                                                                                                                                                                                                                                                                                                                                                                                                                                                                                                                                                                                                                  | mouse   | 1:200 (IF)            |         |          |            |       |       |                       |            |             |       |              |           |       |        |             |             |       |        |             |            |       |        |             |           |       |        |            |            |               |        |            |             |                 |       |            |             |             |       |            |            |                           |       |             |               |       |        |             |               |                           |        |             |                       |                           |       |        |                            |                           |        |            |                                                          |                           |        |             |                                      |                           |        |              |                                     |                           |       |              |
| Anti-TUBA1B                                              | Proteintech                                                                                                                                                                                                                                                                                                                                                                                                                                                                                                                                                                                                                                                                                                                                                                                                                                                                                                                                                                                                                                                                                                                                                                                                                                                                                                                                                                                                                                                                                                                                                                                                                                                                                                                                                                                                                                                                                                      | mouse   | 1:200 (IF)            |         |          |            |       |       |                       |            |             |       |              |           |       |        |             |             |       |        |             |            |       |        |             |           |       |        |            |            |               |        |            |             |                 |       |            |             |             |       |            |            |                           |       |             |               |       |        |             |               |                           |        |             |                       |                           |       |        |                            |                           |        |            |                                                          |                           |        |             |                                      |                           |        |              |                                     |                           |       |              |
| Anti-GAPDH                                               | Cell signaling technology                                                                                                                                                                                                                                                                                                                                                                                                                                                                                                                                                                                                                                                                                                                                                                                                                                                                                                                                                                                                                                                                                                                                                                                                                                                                                                                                                                                                                                                                                                                                                                                                                                                                                                                                                                                                                                                                                        | mouse   | 1:1000 (WB)           |         |          |            |       |       |                       |            |             |       |              |           |       |        |             |             |       |        |             |            |       |        |             |           |       |        |            |            |               |        |            |             |                 |       |            |             |             |       |            |            |                           |       |             |               |       |        |             |               |                           |        |             |                       |                           |       |        |                            |                           |        |            |                                                          |                           |        |             |                                      |                           |        |              |                                     |                           |       |              |
| Anti-Calnexin                                            | abcam                                                                                                                                                                                                                                                                                                                                                                                                                                                                                                                                                                                                                                                                                                                                                                                                                                                                                                                                                                                                                                                                                                                                                                                                                                                                                                                                                                                                                                                                                                                                                                                                                                                                                                                                                                                                                                                                                                            | rabbit  | 1:1000 (WB)           |         |          |            |       |       |                       |            |             |       |              |           |       |        |             |             |       |        |             |            |       |        |             |           |       |        |            |            |               |        |            |             |                 |       |            |             |             |       |            |            |                           |       |             |               |       |        |             |               |                           |        |             |                       |                           |       |        |                            |                           |        |            |                                                          |                           |        |             |                                      |                           |        |              |                                     |                           |       |              |
| Anti-Vinculin                                            | Cell signaling technology                                                                                                                                                                                                                                                                                                                                                                                                                                                                                                                                                                                                                                                                                                                                                                                                                                                                                                                                                                                                                                                                                                                                                                                                                                                                                                                                                                                                                                                                                                                                                                                                                                                                                                                                                                                                                                                                                        | rabbit  | 1:1000 (WB)           |         |          |            |       |       |                       |            |             |       |              |           |       |        |             |             |       |        |             |            |       |        |             |           |       |        |            |            |               |        |            |             |                 |       |            |             |             |       |            |            |                           |       |             |               |       |        |             |               |                           |        |             |                       |                           |       |        |                            |                           |        |            |                                                          |                           |        |             |                                      |                           |        |              |                                     |                           |       |              |
| Anti-Ubiquitin (P4D1)                                    | Cell signaling technology                                                                                                                                                                                                                                                                                                                                                                                                                                                                                                                                                                                                                                                                                                                                                                                                                                                                                                                                                                                                                                                                                                                                                                                                                                                                                                                                                                                                                                                                                                                                                                                                                                                                                                                                                                                                                                                                                        | mouse   | 1:1000                |         |          |            |       |       |                       |            |             |       |              |           |       |        |             |             |       |        |             |            |       |        |             |           |       |        |            |            |               |        |            |             |                 |       |            |             |             |       |            |            |                           |       |             |               |       |        |             |               |                           |        |             |                       |                           |       |        |                            |                           |        |            |                                                          |                           |        |             |                                      |                           |        |              |                                     |                           |       |              |
| Phospho-β-Catenin (Ser675)                               | Cell signaling technology                                                                                                                                                                                                                                                                                                                                                                                                                                                                                                                                                                                                                                                                                                                                                                                                                                                                                                                                                                                                                                                                                                                                                                                                                                                                                                                                                                                                                                                                                                                                                                                                                                                                                                                                                                                                                                                                                        | rabbit  | 1:200 (IF)            |         |          |            |       |       |                       |            |             |       |              |           |       |        |             |             |       |        |             |            |       |        |             |           |       |        |            |            |               |        |            |             |                 |       |            |             |             |       |            |            |                           |       |             |               |       |        |             |               |                           |        |             |                       |                           |       |        |                            |                           |        |            |                                                          |                           |        |             |                                      |                           |        |              |                                     |                           |       |              |
| Non-phospho (Active) β-Catenin (Ser33/37/Thr41) Antibody | Cell signaling technology                                                                                                                                                                                                                                                                                                                                                                                                                                                                                                                                                                                                                                                                                                                                                                                                                                                                                                                                                                                                                                                                                                                                                                                                                                                                                                                                                                                                                                                                                                                                                                                                                                                                                                                                                                                                                                                                                        | rabbit  | 1:1000 (WB)           |         |          |            |       |       |                       |            |             |       |              |           |       |        |             |             |       |        |             |            |       |        |             |           |       |        |            |            |               |        |            |             |                 |       |            |             |             |       |            |            |                           |       |             |               |       |        |             |               |                           |        |             |                       |                           |       |        |                            |                           |        |            |                                                          |                           |        |             |                                      |                           |        |              |                                     |                           |       |              |
| Anti-rabbit IgG, HRP-linked Antibody                     | Cell signaling technology                                                                                                                                                                                                                                                                                                                                                                                                                                                                                                                                                                                                                                                                                                                                                                                                                                                                                                                                                                                                                                                                                                                                                                                                                                                                                                                                                                                                                                                                                                                                                                                                                                                                                                                                                                                                                                                                                        | rabbit  | 1:10000 (WB)          |         |          |            |       |       |                       |            |             |       |              |           |       |        |             |             |       |        |             |            |       |        |             |           |       |        |            |            |               |        |            |             |                 |       |            |             |             |       |            |            |                           |       |             |               |       |        |             |               |                           |        |             |                       |                           |       |        |                            |                           |        |            |                                                          |                           |        |             |                                      |                           |        |              |                                     |                           |       |              |
| Anti-mouse IgG, HRP-linked Antibody                      | Cell signaling technology                                                                                                                                                                                                                                                                                                                                                                                                                                                                                                                                                                                                                                                                                                                                                                                                                                                                                                                                                                                                                                                                                                                                                                                                                                                                                                                                                                                                                                                                                                                                                                                                                                                                                                                                                                                                                                                                                        | mouse   | 1:10000 (WB)          |         |          |            |       |       |                       |            |             |       |              |           |       |        |             |             |       |        |             |            |       |        |             |           |       |        |            |            |               |        |            |             |                 |       |            |             |             |       |            |            |                           |       |             |               |       |        |             |               |                           |        |             |                       |                           |       |        |                            |                           |        |            |                                                          |                           |        |             |                                      |                           |        |              |                                     |                           |       |              |
| Validation                                               | see above in the table (antibody used)                                                                                                                                                                                                                                                                                                                                                                                                                                                                                                                                                                                                                                                                                                                                                                                                                                                                                                                                                                                                                                                                                                                                                                                                                                                                                                                                                                                                                                                                                                                                                                                                                                                                                                                                                                                                                                                                           |         |                       |         |          |            |       |       |                       |            |             |       |              |           |       |        |             |             |       |        |             |            |       |        |             |           |       |        |            |            |               |        |            |             |                 |       |            |             |             |       |            |            |                           |       |             |               |       |        |             |               |                           |        |             |                       |                           |       |        |                            |                           |        |            |                                                          |                           |        |             |                                      |                           |        |              |                                     |                           |       |              |

## Eukaryotic cell lines

Policy information about [cell lines and Sex and Gender in Research](#)

|                                                                   |                                                                        |
|-------------------------------------------------------------------|------------------------------------------------------------------------|
| Cell line source(s)                                               | Induced pluripotent stem cells (TC1133); Neuro2a cells (N2A) (CCL-131) |
| Authentication                                                    | TC1133 / RUCDRi002-A                                                   |
| Mycoplasma contamination                                          | confirmed negative for mycoplasma                                      |
| Commonly misidentified lines (See <a href="#">ICLAC</a> register) | TC1133 or RUCDRi002-A                                                  |

## Palaeontology and Archaeology

|                                                                                                                                                 |    |
|-------------------------------------------------------------------------------------------------------------------------------------------------|----|
| Specimen provenance                                                                                                                             | na |
| Specimen deposition                                                                                                                             | na |
| Dating methods                                                                                                                                  | na |
| <input type="checkbox"/> Tick this box to confirm that the raw and calibrated dates are available in the paper or in Supplementary Information. |    |
| Ethics oversight                                                                                                                                | na |

Note that full information on the approval of the study protocol must also be provided in the manuscript.

## Animals and other research organisms

Policy information about [studies involving animals](#); [ARRIVE guidelines](#) recommended for reporting animal research, and [Sex and Gender in Research](#)

|                         |                                                                                                      |
|-------------------------|------------------------------------------------------------------------------------------------------|
| Laboratory animals      | mice (mus musculus), male and females, 17,5 months-old (average)                                     |
| Wild animals            | na                                                                                                   |
| Reporting on sex        | na                                                                                                   |
| Field-collected samples | na                                                                                                   |
| Ethics oversight        | All animal experiments were approved by the Lower Saxony (AZ-G 20.3434) animal review board (LAVES). |

Note that full information on the approval of the study protocol must also be provided in the manuscript.

## Clinical data

Policy information about [clinical studies](#)

All manuscripts should comply with the ICMJE [guidelines for publication of clinical research](#) and a completed [CONSORT checklist](#) must be included with all submissions.

|                             |    |
|-----------------------------|----|
| Clinical trial registration | na |
| Study protocol              | na |
| Data collection             | na |
| Outcomes                    | na |

## Dual use research of concern

Policy information about [dual use research of concern](#)

### Hazards

Could the accidental, deliberate or reckless misuse of agents or technologies generated in the work, or the application of information presented in the manuscript, pose a threat to:

| No                                  | Yes                      |                            |
|-------------------------------------|--------------------------|----------------------------|
| <input checked="" type="checkbox"/> | <input type="checkbox"/> | Public health              |
| <input checked="" type="checkbox"/> | <input type="checkbox"/> | National security          |
| <input checked="" type="checkbox"/> | <input type="checkbox"/> | Crops and/or livestock     |
| <input checked="" type="checkbox"/> | <input type="checkbox"/> | Ecosystems                 |
| <input checked="" type="checkbox"/> | <input type="checkbox"/> | Any other significant area |

## Experiments of concern

Does the work involve any of these experiments of concern:

- |                                     |                          |                                                                             |
|-------------------------------------|--------------------------|-----------------------------------------------------------------------------|
| No                                  | Yes                      |                                                                             |
| <input checked="" type="checkbox"/> | <input type="checkbox"/> | Demonstrate how to render a vaccine ineffective                             |
| <input checked="" type="checkbox"/> | <input type="checkbox"/> | Confer resistance to therapeutically useful antibiotics or antiviral agents |
| <input checked="" type="checkbox"/> | <input type="checkbox"/> | Enhance the virulence of a pathogen or render a nonpathogen virulent        |
| <input checked="" type="checkbox"/> | <input type="checkbox"/> | Increase transmissibility of a pathogen                                     |
| <input checked="" type="checkbox"/> | <input type="checkbox"/> | Alter the host range of a pathogen                                          |
| <input checked="" type="checkbox"/> | <input type="checkbox"/> | Enable evasion of diagnostic/detection modalities                           |
| <input checked="" type="checkbox"/> | <input type="checkbox"/> | Enable the weaponization of a biological agent or toxin                     |
| <input checked="" type="checkbox"/> | <input type="checkbox"/> | Any other potentially harmful combination of experiments and agents         |

## ChIP-seq

### Data deposition

- ☐ Confirm that both raw and final processed data have been deposited in a public database such as [GEO](#).
- ☐ Confirm that you have deposited or provided access to graph files (e.g. BED files) for the called peaks.

Data access links

*May remain private before publication.*

na

Files in database submission

na

Genome browser session

(e.g. [UCSC](#))

na

### Methodology

Replicates

na

Sequencing depth

na

Antibodies

na

Peak calling parameters

na

Data quality

na

Software

na

## Flow Cytometry

### Plots

Confirm that:

- ☐ The axis labels state the marker and fluorochrome used (e.g. CD4-FITC).
- ☐ The axis scales are clearly visible. Include numbers along axes only for bottom left plot of group (a 'group' is an analysis of identical markers).
- ☐ All plots are contour plots with outliers or pseudocolor plots.
- ☐ A numerical value for number of cells or percentage (with statistics) is provided.

### Methodology

Sample preparation

na

Instrument

na

Software

na

Cell population abundance

na

Gating strategy

na

☐ Tick this box to confirm that a figure exemplifying the gating strategy is provided in the Supplementary Information.

## Magnetic resonance imaging

### Experimental design

Design type

na

Design specifications

na

Behavioral performance measures

na

### Acquisition

Imaging type(s)

na

Field strength

na

Sequence &amp; imaging parameters

na

Area of acquisition

na

Diffusion MRI

☐ Used

☐ Not used

### Preprocessing

Preprocessing software

na

Normalization

na

Normalization template

na

Noise and artifact removal

na

Volume censoring

na

### Statistical modeling & inference

Model type and settings

na

Effect(s) tested

Define precise effect in terms of the task or stimulus conditions instead of psychological concepts and indicate whether ANOVA or factorial designs were used.

Specify type of analysis: ☐ Whole brain ☐ ROI-based ☐ BothStatistic type for inference  
(See [Eklund et al. 2016](#))

na

Correction

na

### Models & analysis

n/a

Involved in the study

☐ ☐ Functional and/or effective connectivity

☐ ☐ Graph analysis

☐ ☐ Multivariate modeling or predictive analysis

Functional and/or effective connectivity

Report the measures of dependence used and the model details (e.g. Pearson correlation, partial correlation, mutual information).

Graph analysis

Report the dependent variable and connectivity measure, specifying weighted graph or binarized graph, subject- or group-level, and the global and/or node summaries used (e.g. clustering coefficient, efficiency, etc.).

Multivariate modeling and predictive analysis

Specify independent variables, features extraction and dimension reduction, model, training and evaluation metrics.
